# Supplementary material for: Boron Clusters as Enhancers of RNase H Activity in the Smart Strategy of Gene Silencing by Antisense Oligonucleotides
Source: MDPI journal article supplement (doi:10.3390/ijms232012190), 2022-10-13

## Supplementary Material

### Boron clusters as enhancers of RNase H activity in the smart strategy of gene silencing by antisense oligonucleotides

Damian Kaniowski<sup>1,\*</sup>, Katarzyna Kulik<sup>1</sup>, Justyna Suwara<sup>1</sup>, Katarzyna Ebenryter-Olbińska<sup>1</sup>, Barbara Nawrot<sup>1,\*</sup>

<sup>1</sup>Centre of Molecular and Macromolecular Studies, Polish Academy of Sciences, Sienkiewicza 112, 90-363 Lodz, Poland

\* correspondence: dkanio@cbmm.lodz.pl; bnawrot@cbmm.lodz.pl

#### Table of contents:

##### 1. Spectral and mass spectrometry analysis of products

**Figure S1.** Analytical RP HPLC profiles and MALDI-TOF or ESI-Q-TOF mass spectra of 1 - 4, P1a - P1e, P2a-P2c, 1a<sub>1</sub> – 1a<sub>3</sub>, 1b<sub>1</sub>, 1c<sub>1</sub>, 1d<sub>1</sub>, 1e<sub>1</sub>, 2a<sub>1</sub>, 2b<sub>1</sub>, 2c<sub>1</sub>.

**Figure S2.** Spectral analysis of 8-(5-azido-3-oxa-pentoxo)-3-iron-bis(1,2-dicarbollide) [Fe(C<sub>2</sub>B<sub>9</sub>H<sub>11</sub>)<sub>2</sub>]<sup>-</sup> (azido derivative of FESAN).

**Figure S3.** Spectral analysis of 1-(3-azidopropyl)-1,2-dicarba-*closo*-dodecaborane (1,2-DCDDB, [C<sub>2</sub>B<sub>10</sub>H<sub>12</sub>]) (azido derivative of 1,2-dicarba-*closo*-dodecaborate).

**Figure S4.** Spectral analysis of the bis-tetrabutylammonium-(4-azidobutoxy)-undecahydro-*closo*-dodecaborate (DDB, [B<sub>12</sub>H<sub>12</sub>]<sup>2-</sup>) (azido derivative of *closo*-dodecaborate).

**Figure S1.** Analytical RP HPLC profiles and MALDI-TOF or ESI-Q-TOF mass spectra of **1** - **4**, P1a - P1e, P2a-P2c, 1a<sub>1</sub> – 1a<sub>3</sub>, 1b<sub>1</sub>, 1c<sub>1</sub>, 1d<sub>1</sub>, 1e<sub>1</sub>, 2a<sub>1</sub>, 2b<sub>1</sub>, 2c<sub>1</sub>.

RP-HPLC conditions were as follow: the buffer A (0.1 M CH<sub>3</sub>COONH<sub>4</sub>) and the buffer B (100% CH<sub>3</sub>CN). The buffer B gradient:

B1: 0→2 min 0%; 2→25 min 0-48%; 25→30 min 48-60%; 30→35 min 60-0%; 35→38 min 0%

B2: 0→2 min 0%; 2→25 min 0-45%; 25→28 min 48-60%; 28→30 min 60-0%; 30→33 min 0%.

RP-HPLC conditions for **3** and **4** were as follow: the buffer A (0.1 M CH<sub>3</sub>COONH<sub>4</sub>) and the buffer B (0.1 M CH<sub>3</sub>COONH<sub>4</sub> / 40%CH<sub>3</sub>CN). The buffer B3 gradient: 0→3 min 0%; 3→23 min 0-100%; 23→27 min 100%; 27→30 min 100-0%; 30→32 min 0%.

### 1: 5'-d(TTT CTT TTC CTC C)-3'

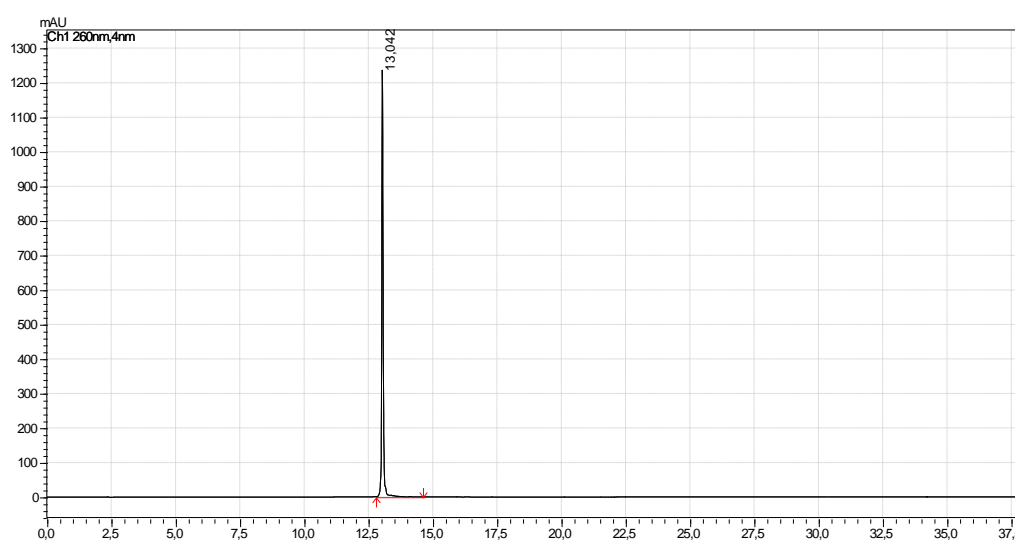

### ESI-Q-TOF

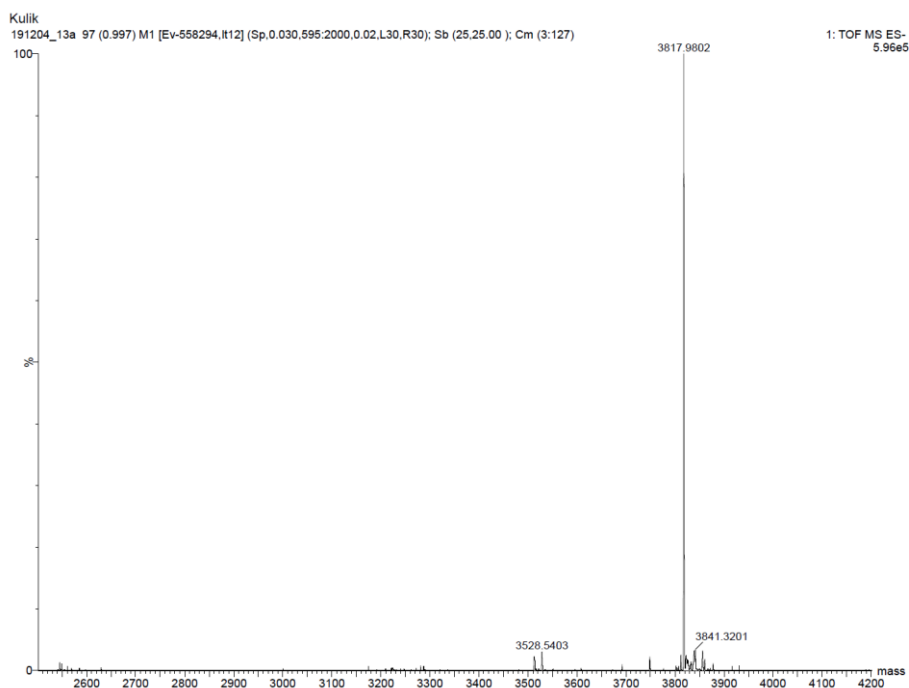

## 2: 5'-d(CTC CAG AGC CCG A)-3'

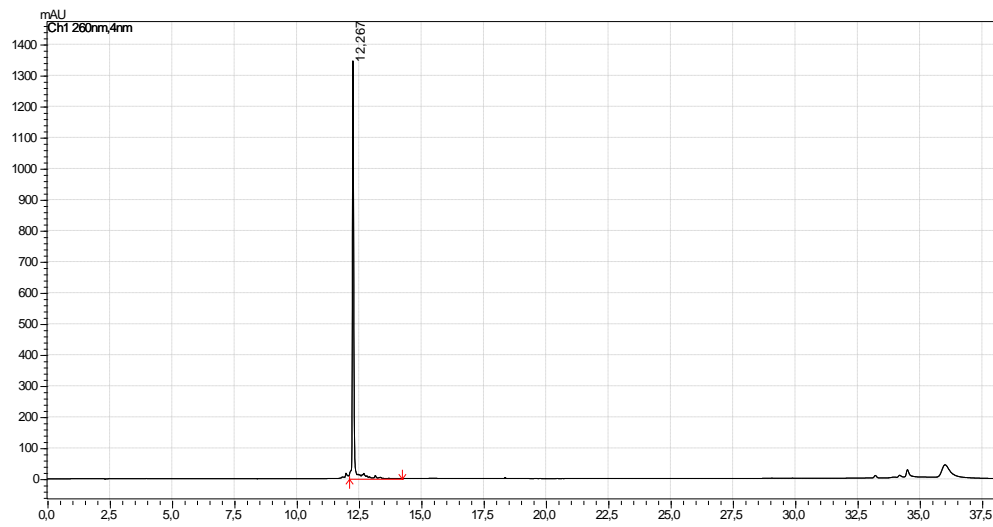

## ESI-Q-TOF

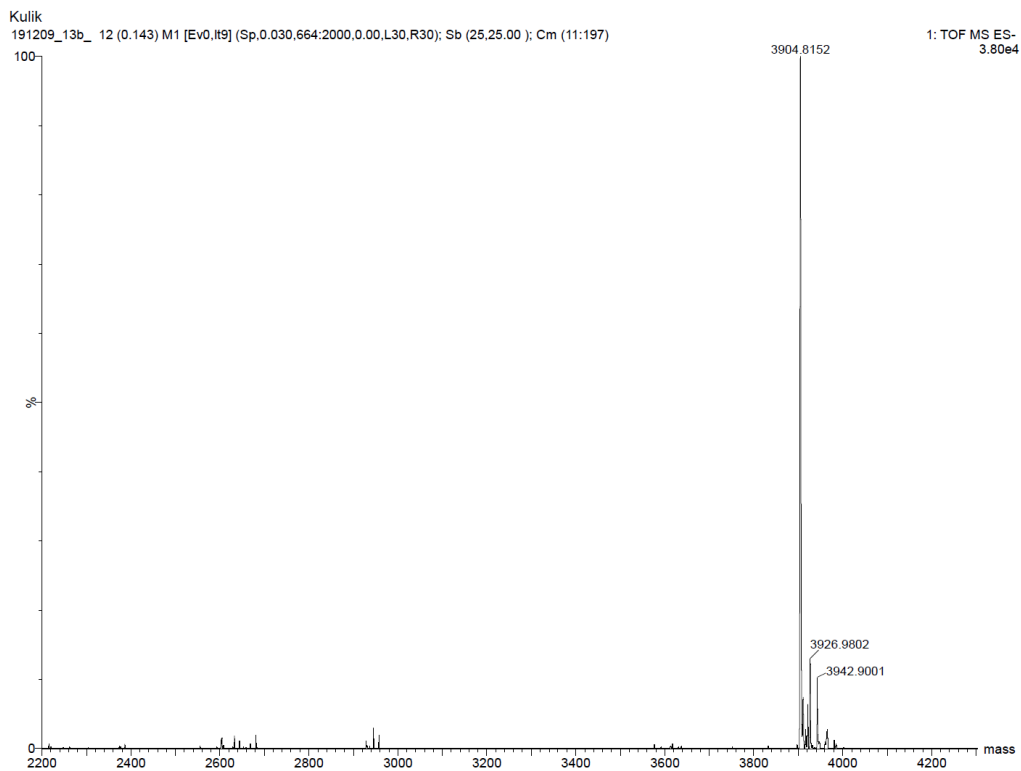

**P1a: 5'-d(U<sub>Pr</sub>TT CTT TTC CTC C)-3'**

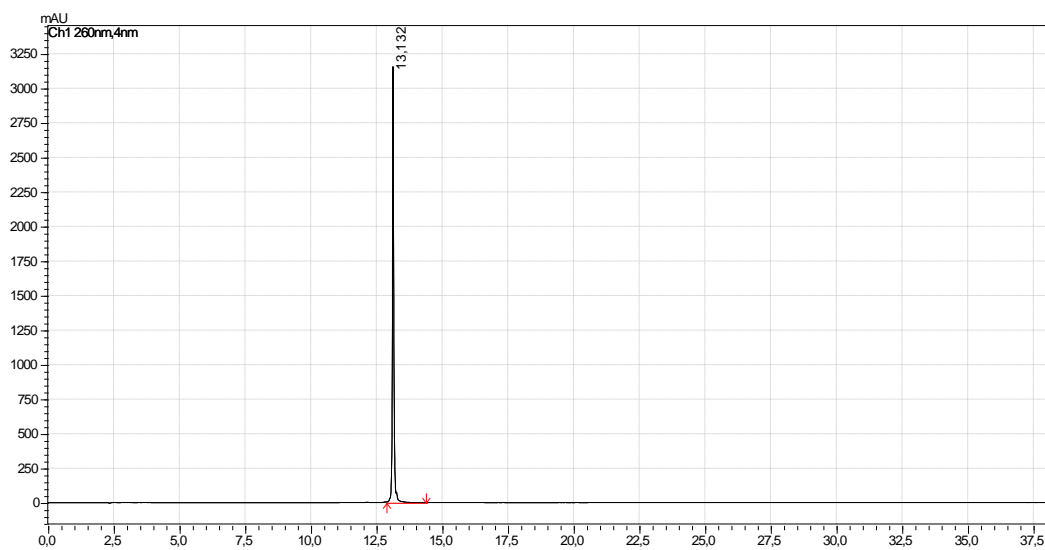

**ESI-Q-TOF**

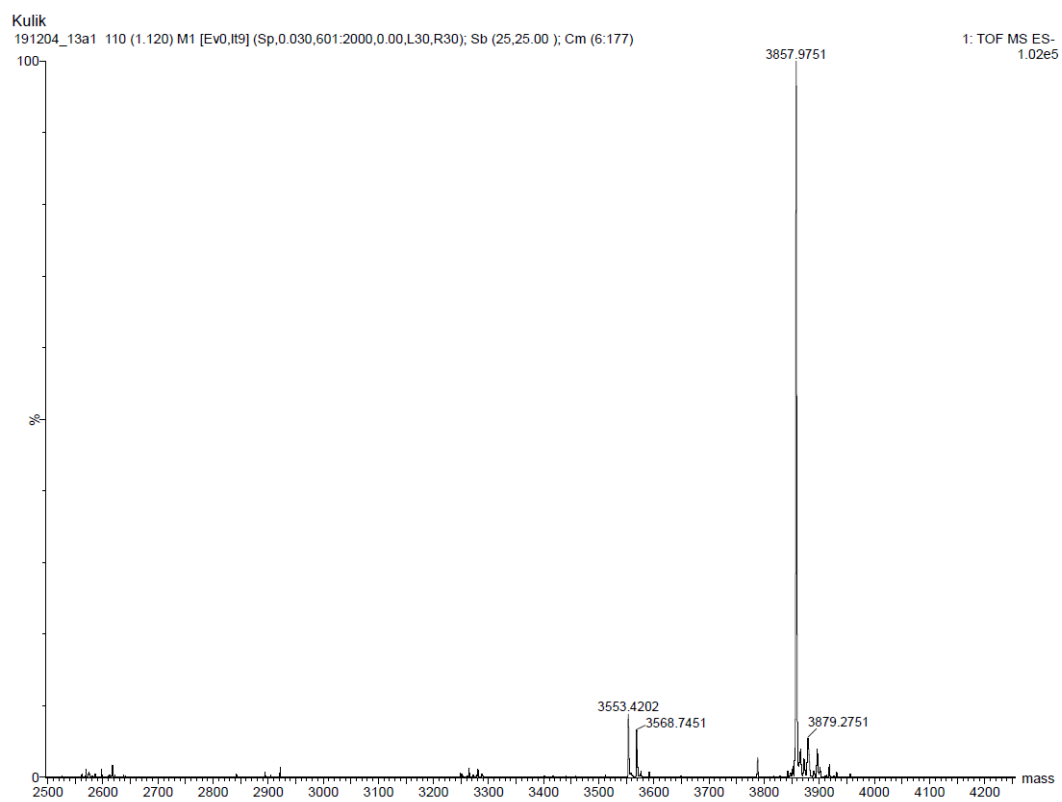

## P1b: 5'-d(TT**U**<sub>Pr</sub> CTT TTC CTC C)-3'

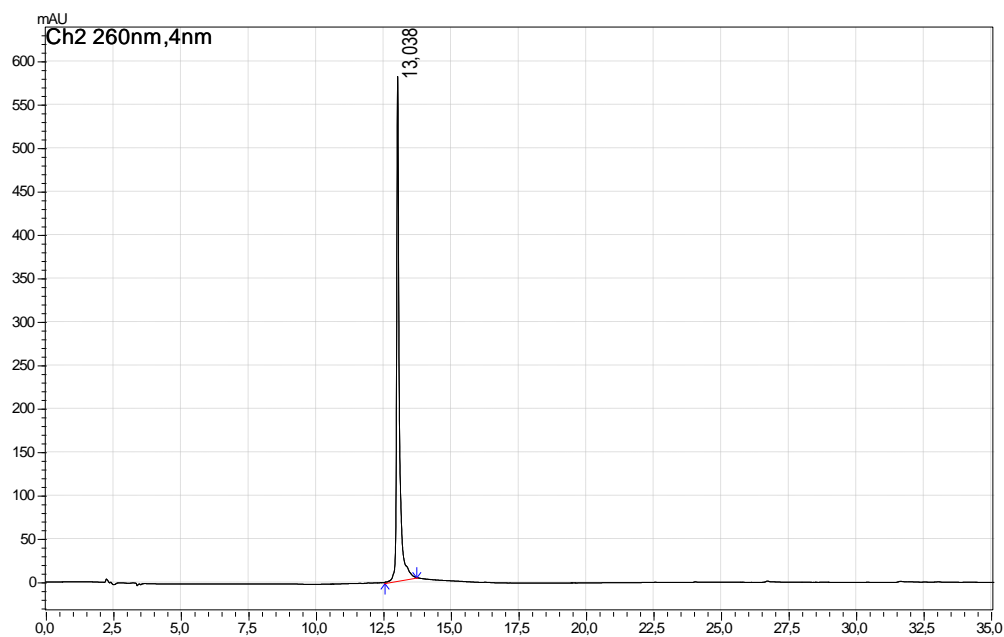

## MALDI-TOF

Ebenryter-Olbinska K, 13a3, linear neg  
HPA 50 mg/mL H<sub>2</sub>O/ACN 1:1 v/v, AC 50 mg/mL H<sub>2</sub>O/ACN 1:1 v/v; HPA/AC 8:1  
Data: hg770002.D2[c] 13 Mar 2019 15:11 Cal: HPA\_T5\_T124 31 Oct 2018 15:37  
Shimadzu Biotech Axima Performance 2.9.1.20100121: Mode Linear\_neg\_2018, Power: 104, Blanked, P.Ext. @ 2800 (bin 76)  
%Int. 13 mV[sum= 1411 mV] Profiles 1-107 Smooth Gauss 15-Baseline 60

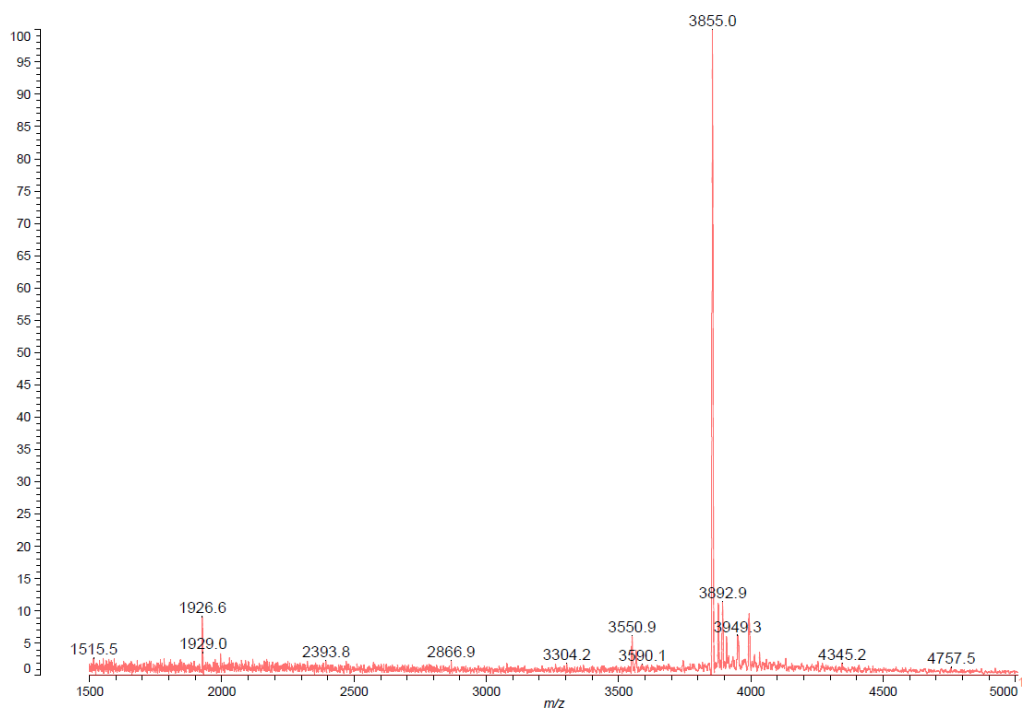

**P1c: 5'-d(TTT CTT U<sub>Pr</sub>TC CTC C)-3'**

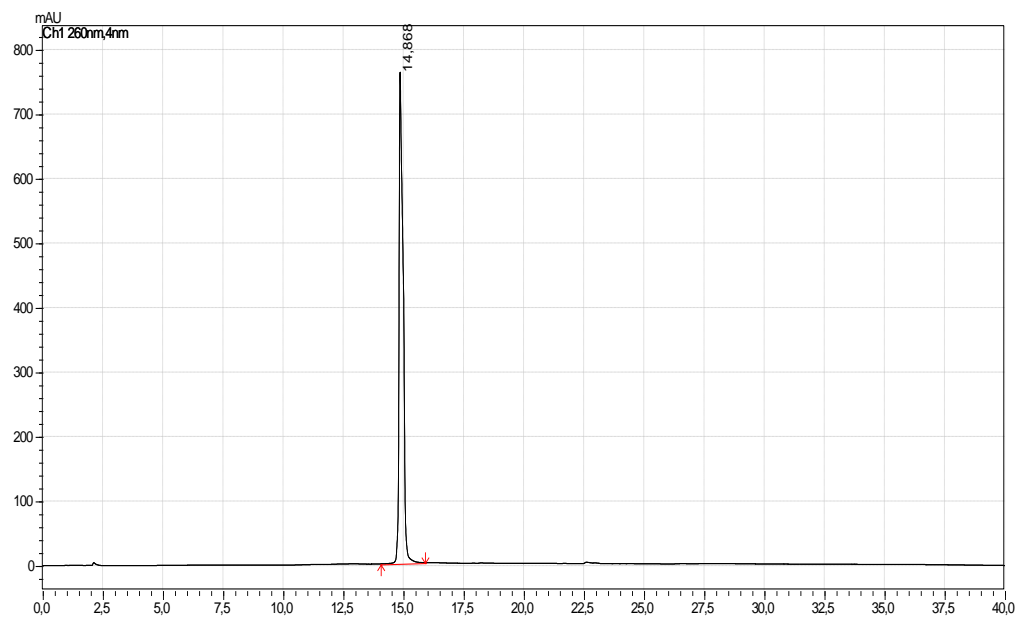

**ESI-Q-TOF**

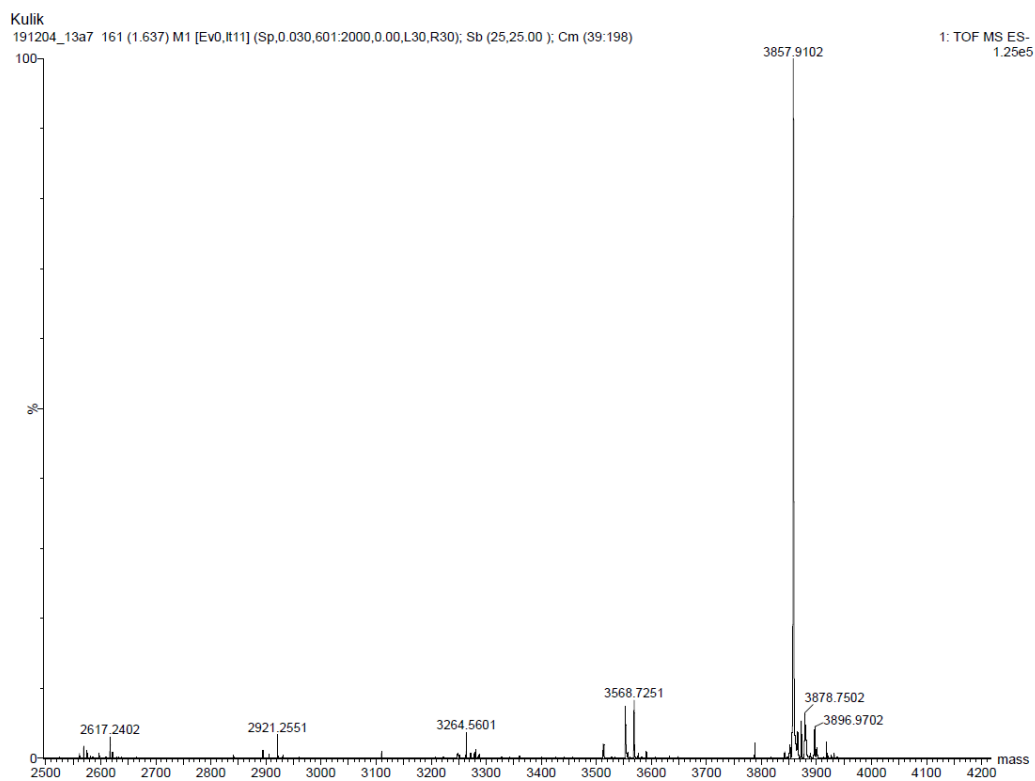

**P1d: 5'-d(TTT CTT TTC C<sub>U<sub>Pr</sub></sub>C C)-3'**

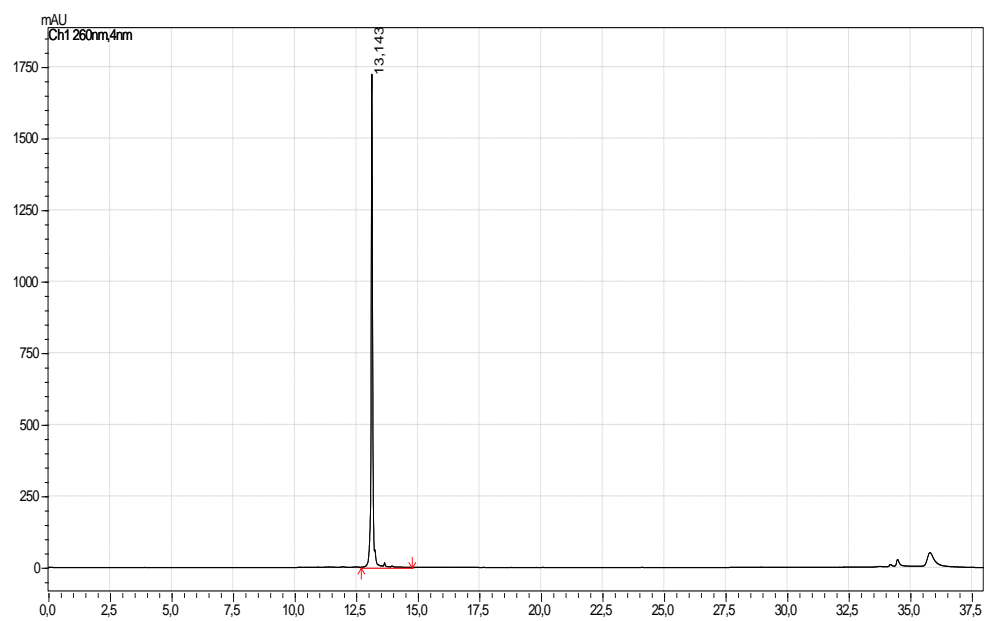

**ESI-Q-TOF**

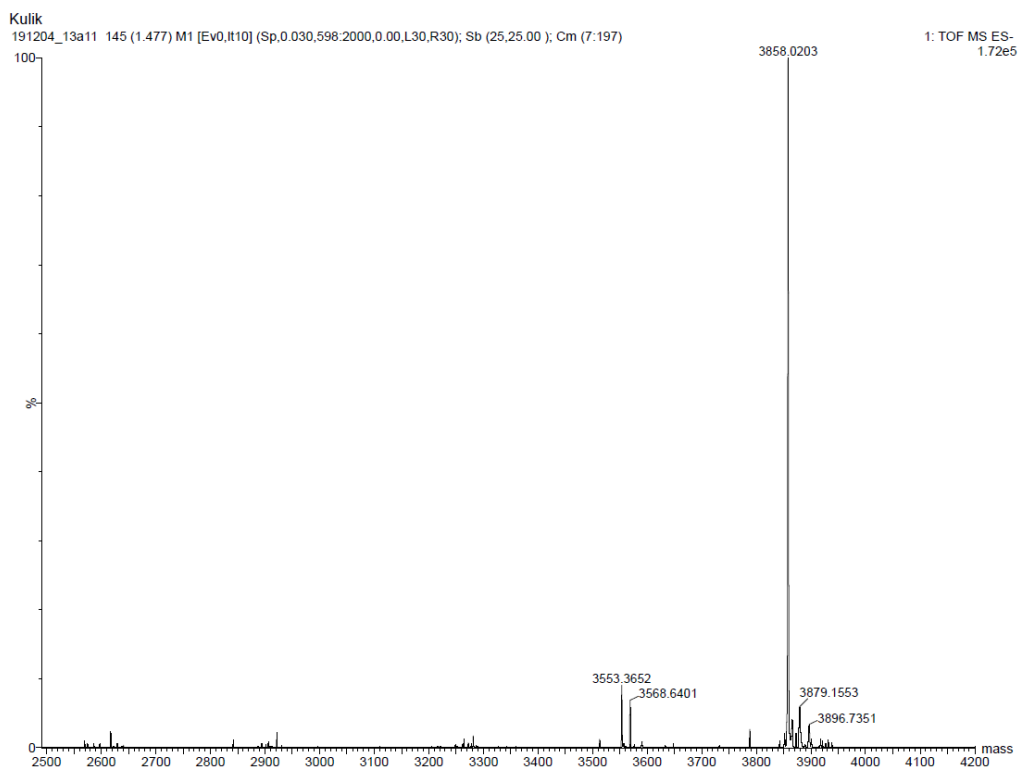

**P1e: 5'-d(TT<sub>U<sub>Pr</sub></sub> CTT <sub>U<sub>Pr</sub></sub> TC CTC C)-3'**

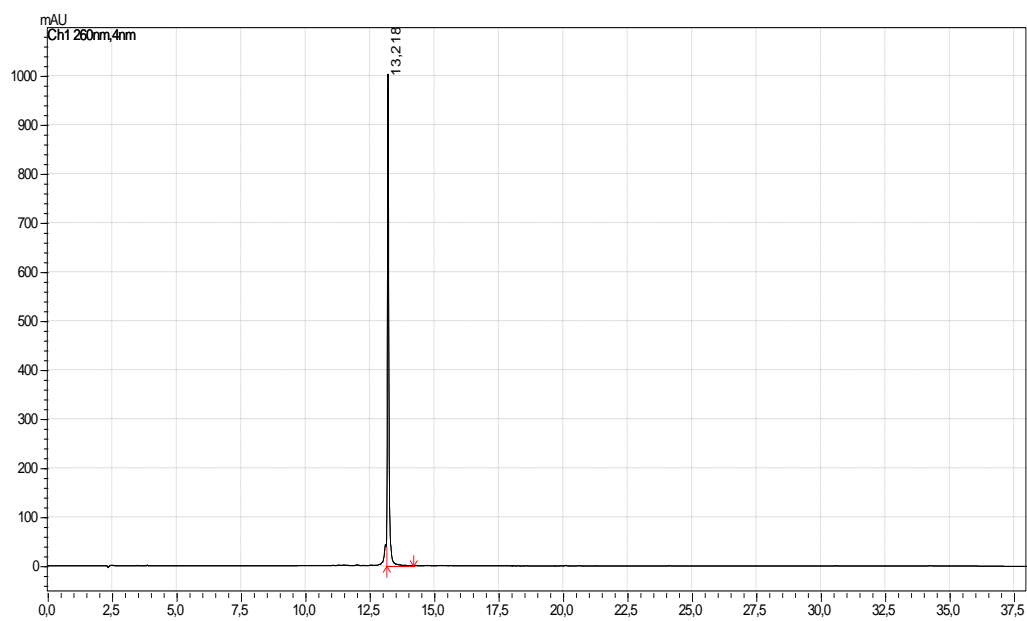

**ESI-Q-TOF**

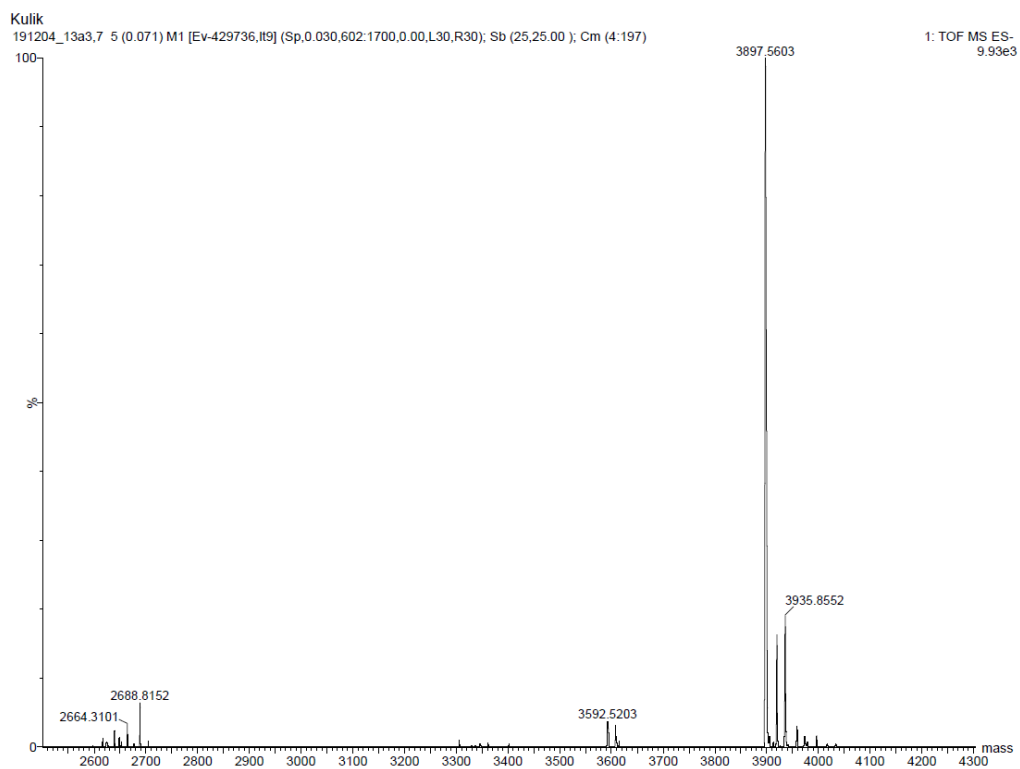



**P2a: 5'-d(CU<sub>Pr</sub>C CAG AGC CCG A)-3'**

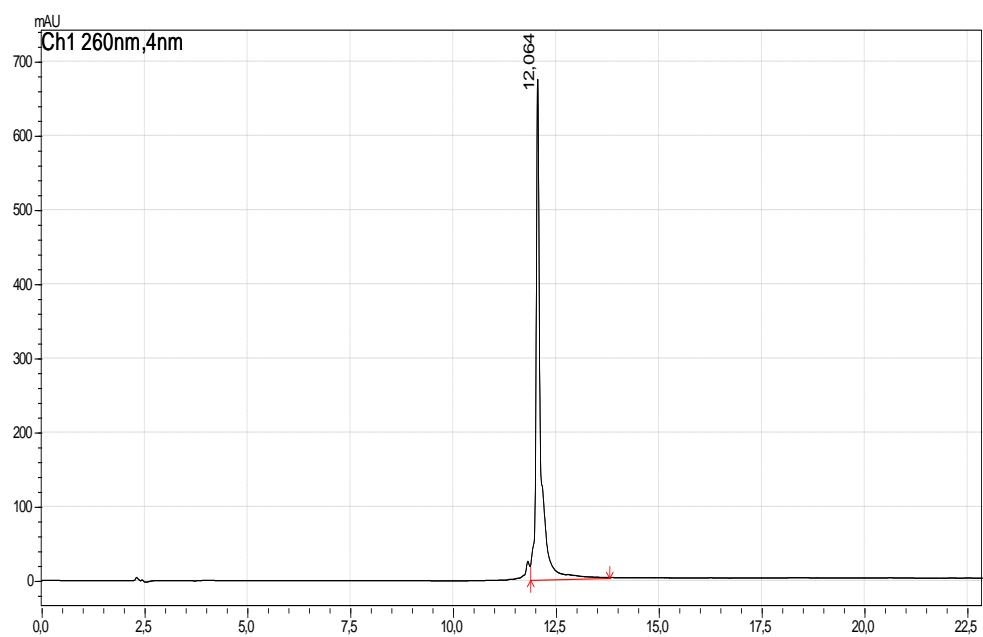

**ESI-Q-TOF**

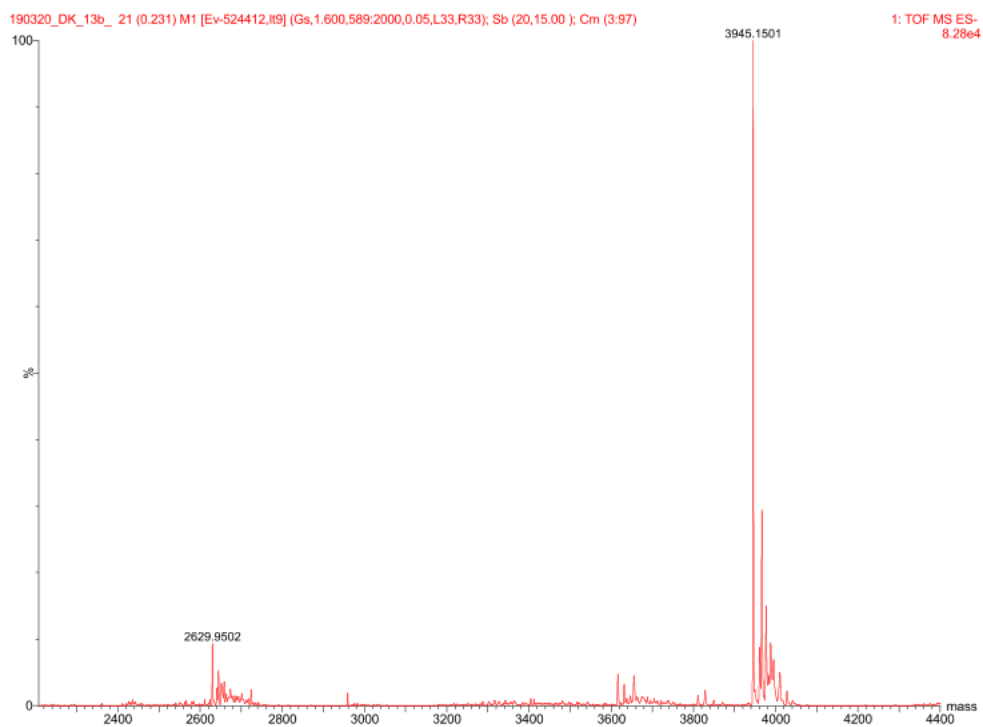

## P2b: 5'-d(CTC CAG AGC C<sub>U<sub>Pr</sub></sub>G A)-3'

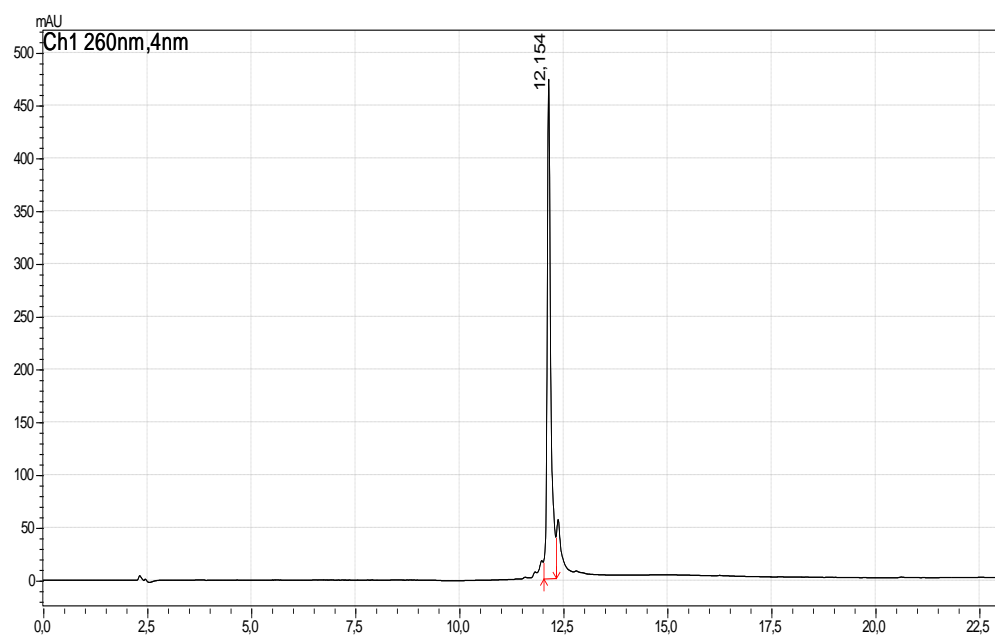

## MALDI-TOF

Ebenryter-Olbinska,K, 13b11, linear neg  
HPA 50 mg/mL H<sub>2</sub>O/ACN 1:1 v/v, AC 50 mg/mL H<sub>2</sub>O/ACN 1:1 v/v; HPA/AC 8:1  
Data: hg790001.D8[c] 13 Mar 2019 15:22 Cal: HPA\_T5\_T124 31 Oct 2018 15:37  
Shimadzu Biotech Axima Performance 2.9.1.20100121: Mode Linear\_neg\_2018, Power: 115, Blanked, P.Ext. @ 2800 (bin 76)  
%Int. 24 mV[sum= 4825 mV] Profiles 1-200 Smooth Gauss 15-Baseline 60

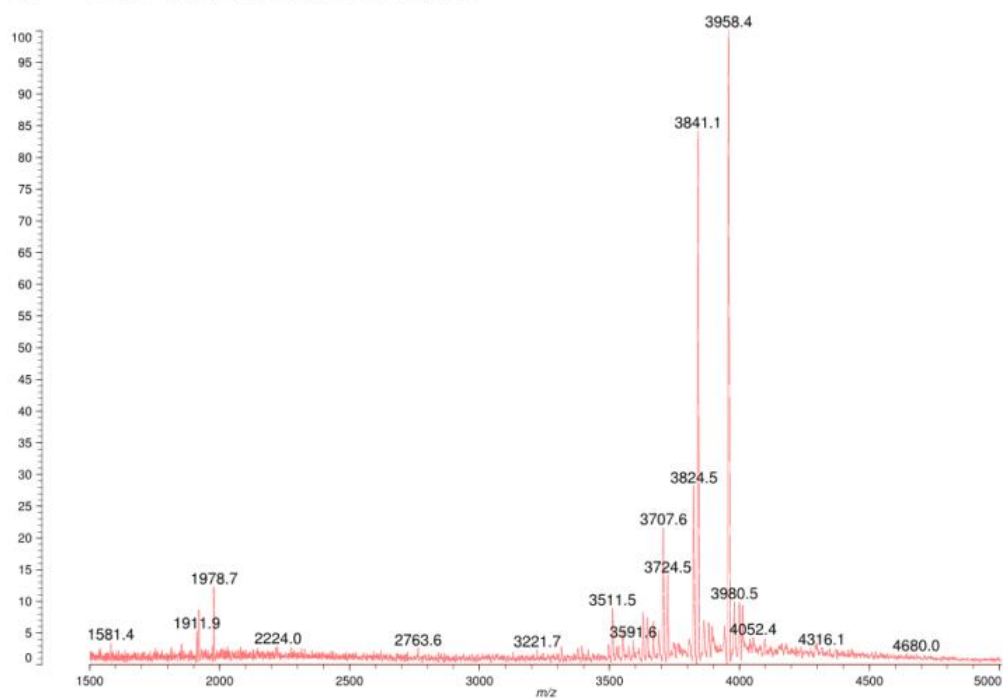

## P2c: 5'-d(CU<sub>Pr</sub>C CAG AGC CU<sub>Pr</sub>G A)-3'

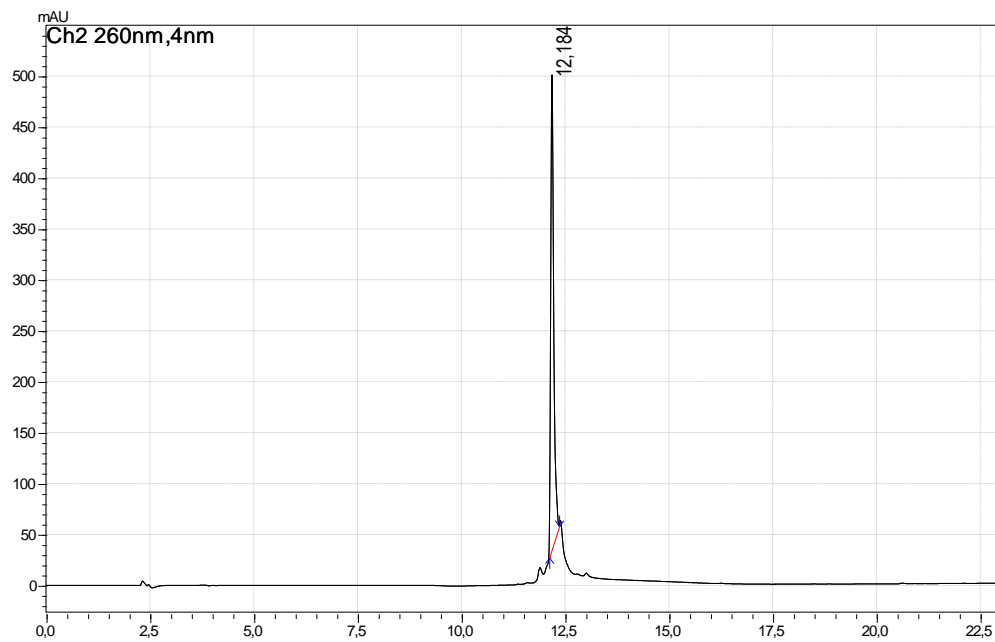

## MALDI-TOF

Ebenryter-Olbinska.K, 13b2,11, linear neg  
HPA 50 mg/mL H<sub>2</sub>O/ACN 1:1 v/v, AC 50 mg/mL H<sub>2</sub>O/ACN 1:1 v/v; HPA/AC 8:1  
Data: hg780004.D6[c] 13 Mar 2019 15:20 Cal: HPA\_T5\_T124 31 Oct 2018 15:37  
Shimadzu Biotech Axima Performance 2.9.1.20100T21: Mode Linear\_neg\_2018, Power: 109, Blanked, P.Ext. @ 2800 (bin 76)  
%Int. 12 mV[sum= 1475 mV] Profiles 1-128 Smooth Gauss 15-Baseline 60

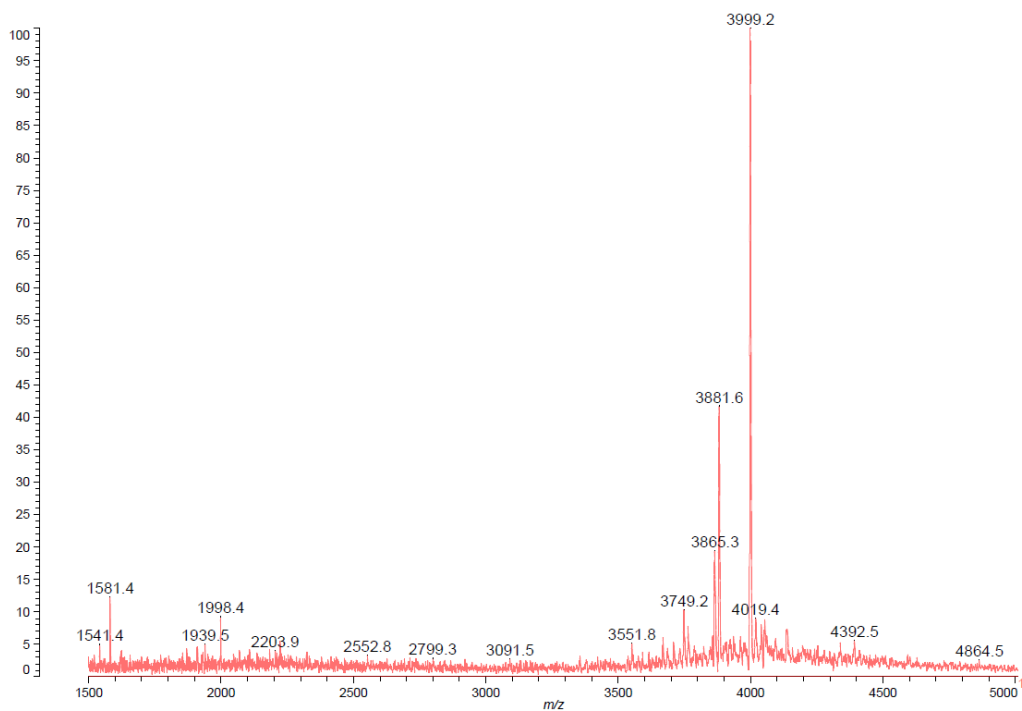

## 1a: 5'-d(U<sub>B1</sub>TT CTT TTC CTC C)-3'

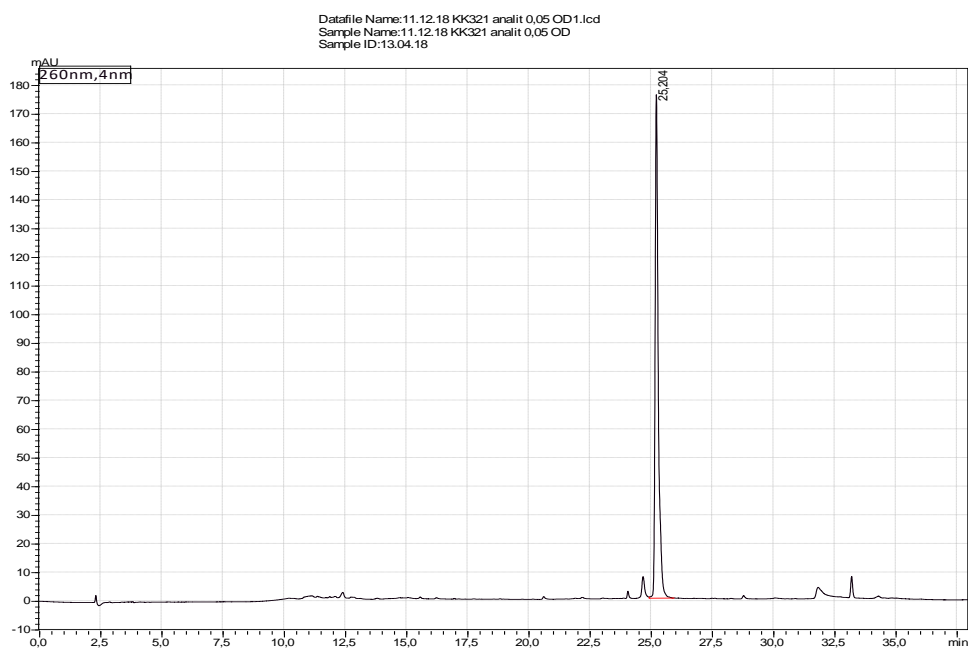

## MALDI-TOF

Kulik K, KK-321, linear neg  
HPA 50 mg/mL H<sub>2</sub>O/ACN 1:1 v/v, AC 50 mg/mL H<sub>2</sub>O/ACN 1:1 v/v; HPA/AC 8:1  
Data: he280003.L11[c] 3 Dec 2018 15:03 Cal: HPA\_T5\_T18 31 Oct 2018 15:33  
Shimadzu Biotech Axima Performance 2.9.1.20100121: Mode Linear\_neg\_2018, Power: 118, Blanked, P.Ext. @ 3800 (bin 88)  
%Int. 33 mV[sum= 6576 mV] Profiles 1-200 Smooth Av 20 -Baseline 60

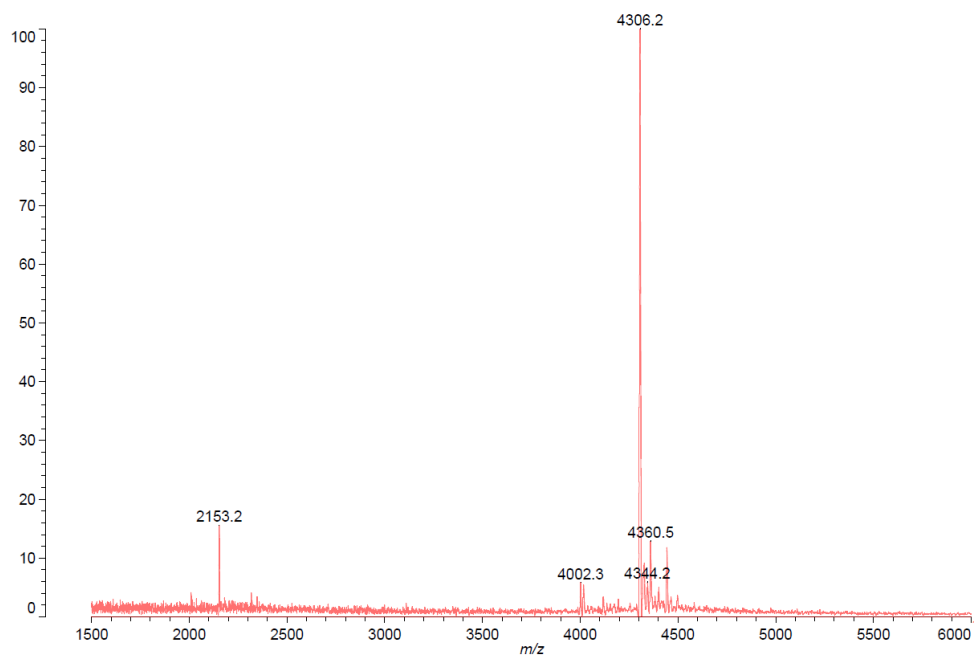

1a2: 5'-d(**U**<sub>B2</sub>TT CTT TTC CTC C)-3' (B2 RP-HPLC program)

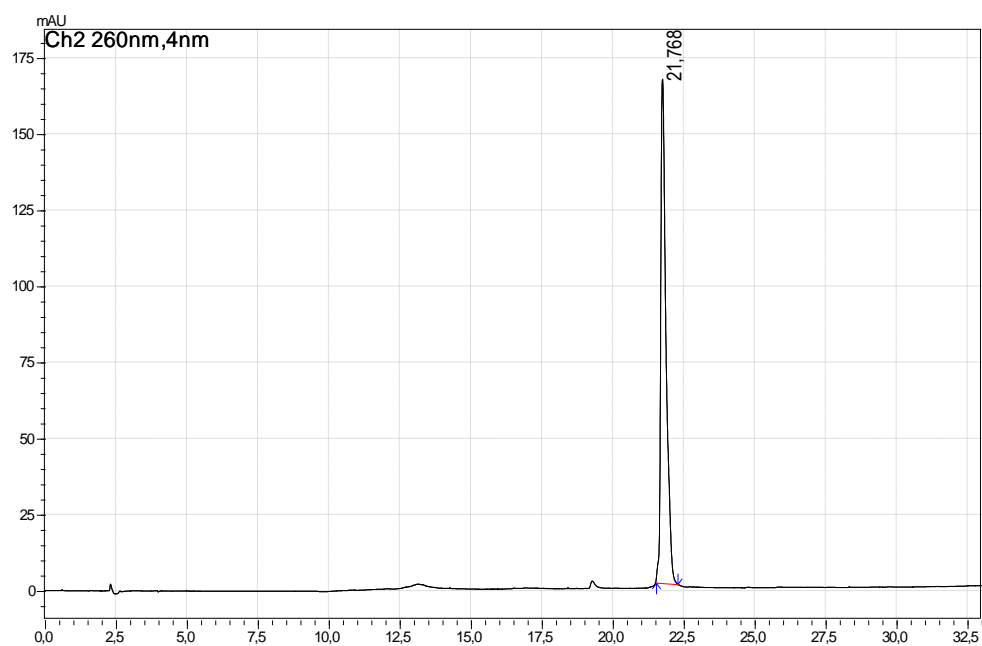

ESI-Q-TOF

200518\_13a1\_628016 89 (0.917) M1 [Ev0,It14] (Gs,0.035,400:1437,0.01,L33,R33); Cm (5:194)

1: TOF MS ES-  
1.54e8

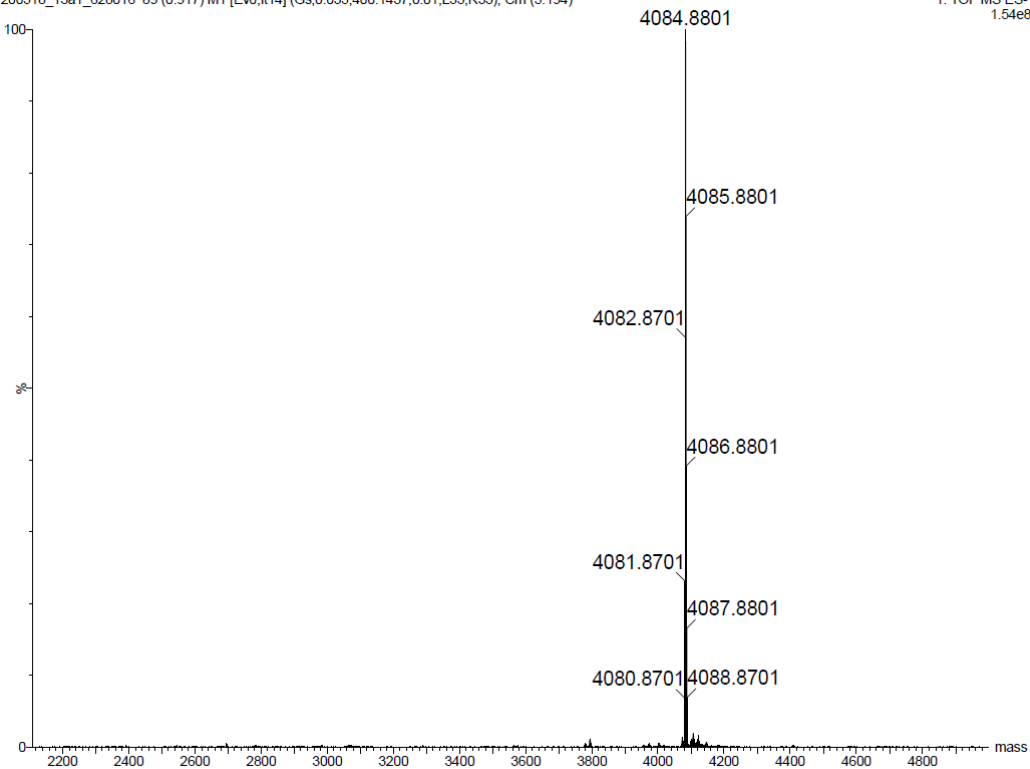

1a3: 5'-d(U<sub>B3</sub>TT CTT TTC CTC C)-3' (B2 RP-HPLC program)

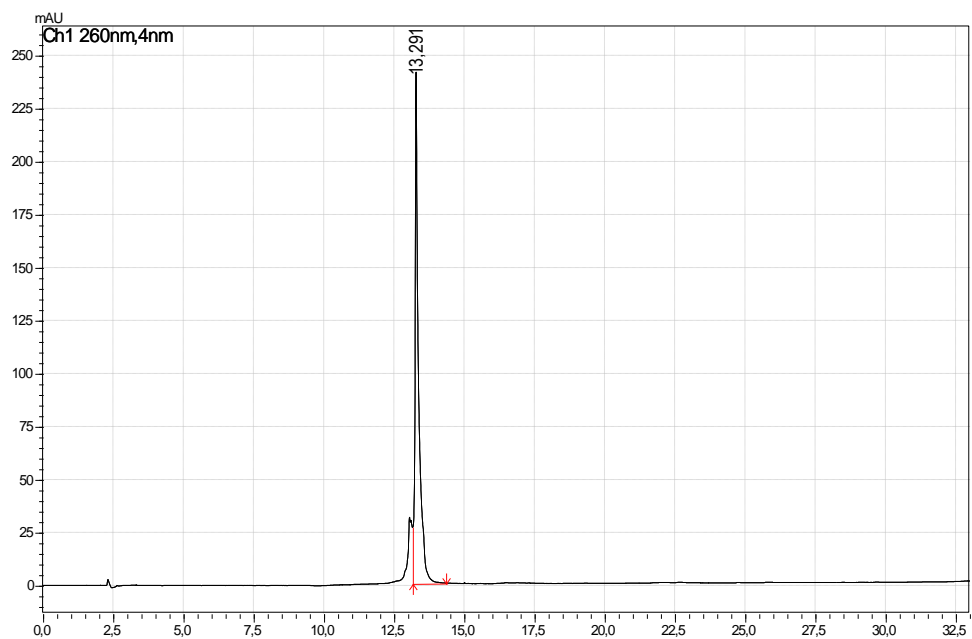

ESI-Q-TOF

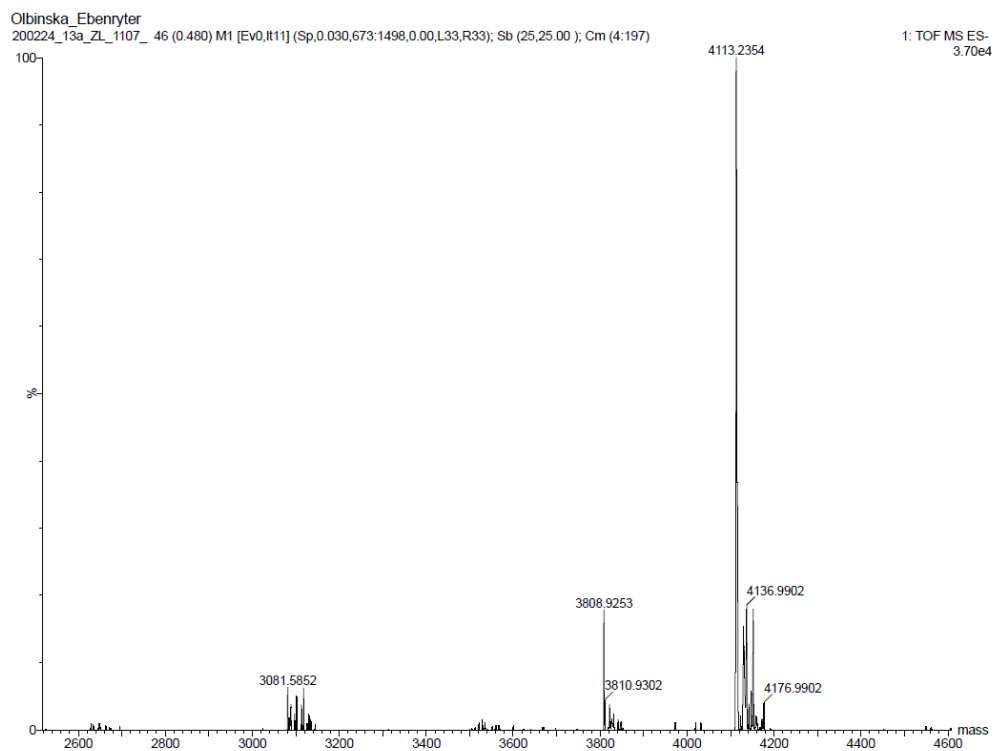

**1b1: 5'-d(TT U<sub>B1</sub> CTT TTC CTC C)-3' (B2 RP-HPLC program)**

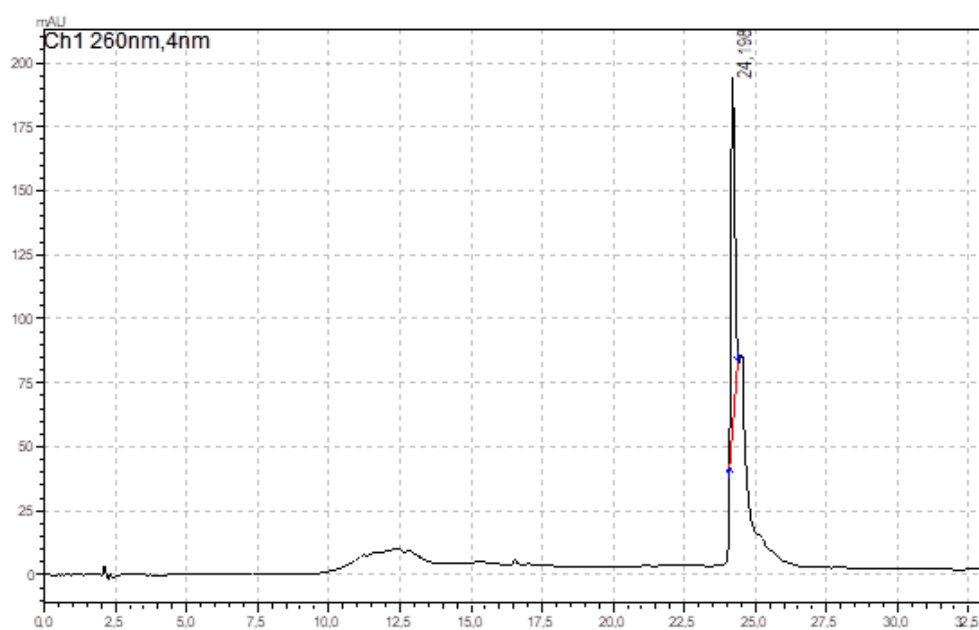

ESI-Q-TOF

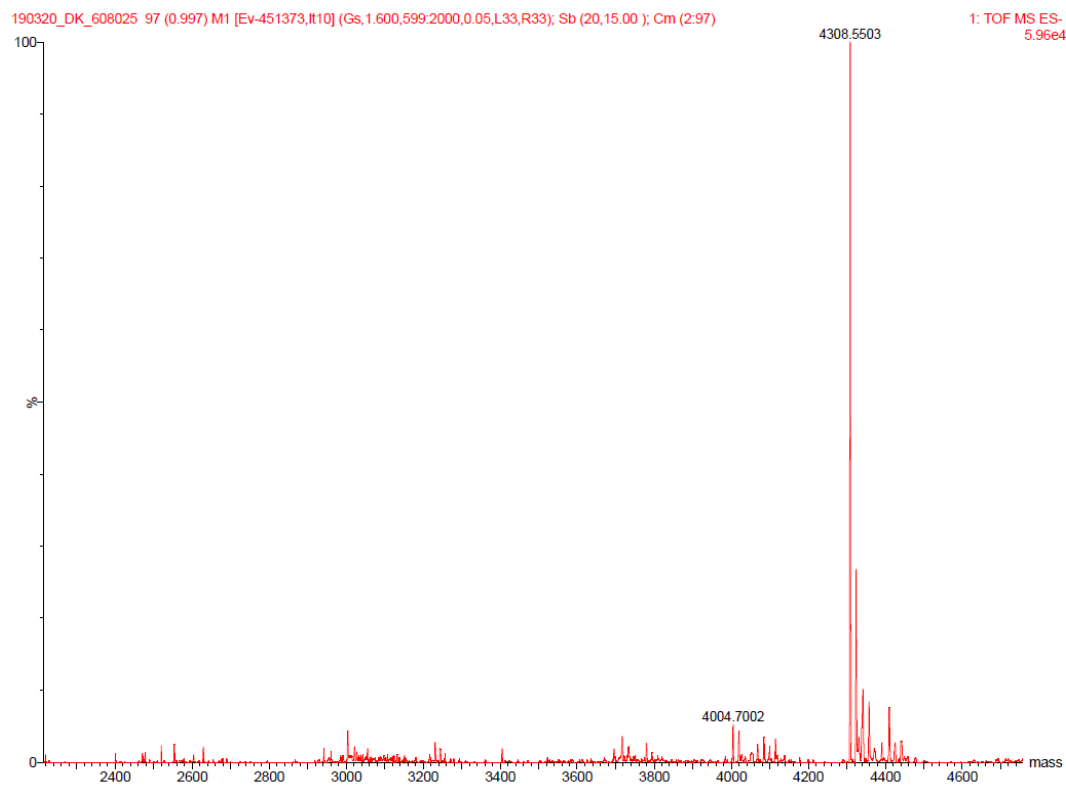

1c1 : 5'-d(TTT CTT **U<sub>B1</sub>**TC CTC C)-3'

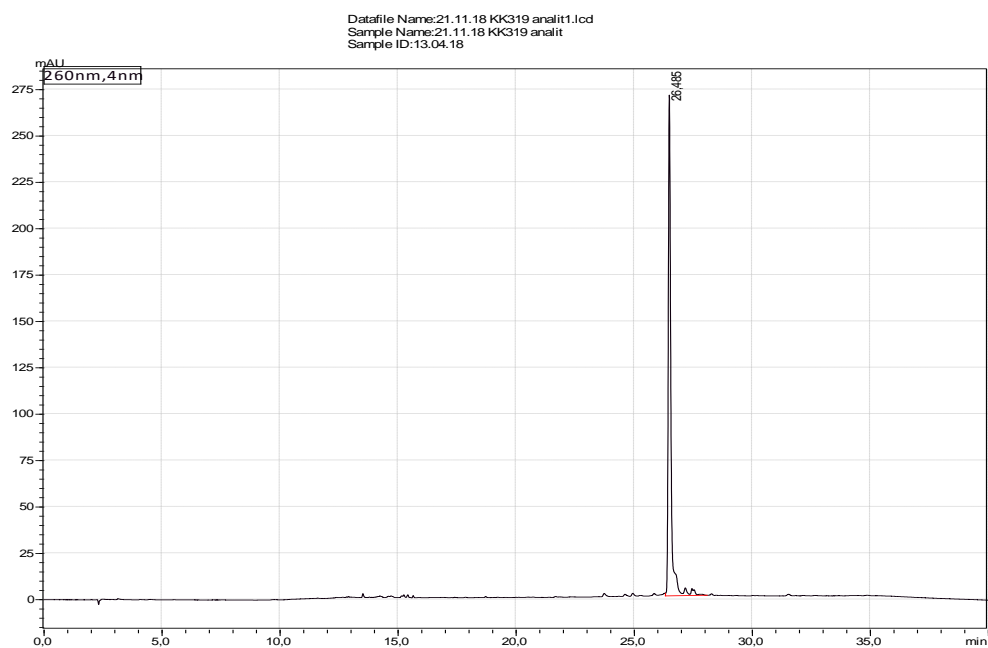

## MALDI-TOF

Kulik K, KK319, linear neg  
HPA 50 mg/mL H<sub>2</sub>O/ACN 1:1 v/v, AC 50 mg/mL H<sub>2</sub>O/ACN 1:1 v/v, HPA/AC 8:1  
Data: he050001.D15[c] 19 Nov 2018 14:51 Cal: HPA T5 T18 31 Oct 2018 15:33  
Shimadzu Biotech Axima Performance 2.9.1 20100121 Mode Linear\_neg 2018, Power: 112, Blanked, P.Ext. @ 3500 (bin 85)  
%Int. 15mV [sum=2915mV] Profiles 1-200 Smooth Gauss 15 -Baseline 60

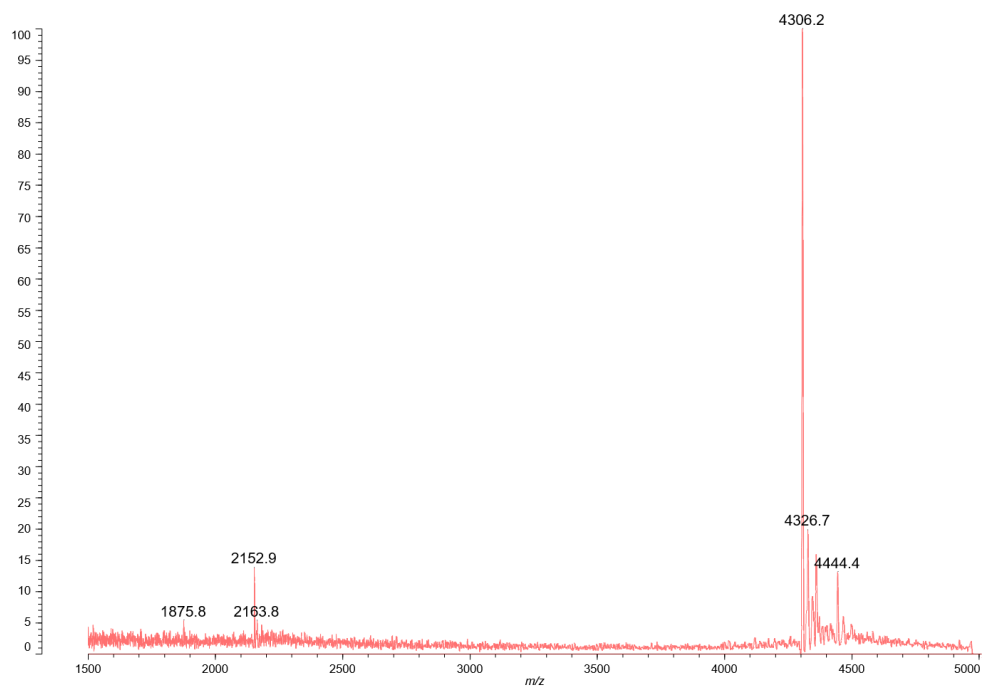



1d1: 5'-d(TTT CTT TTC C**U<sub>B1</sub>**C C)-3'

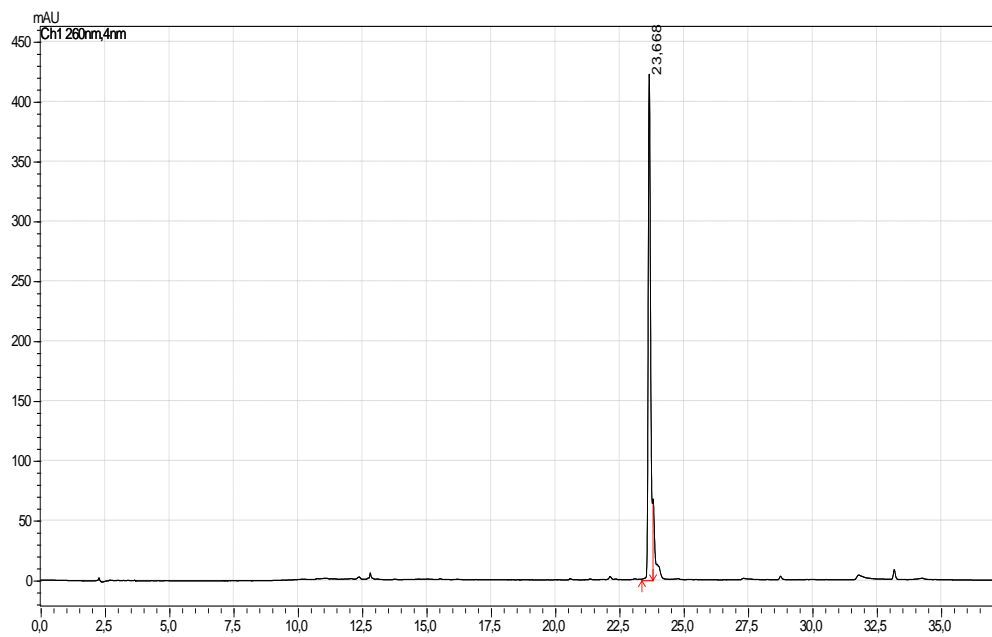

## MALDI-TOF

Kulik K, KK-324, linear neg  
HPA 50 mg/mL H<sub>2</sub>O/ACN 1:1 v/v, AC 50 mg/mL H<sub>2</sub>O/ACN 1:1 v/v; HPA/AC 8:1  
Data: he290002.L13[c] 3 Dec 2018 15:08 Cal: HPA\_T5\_T18 31 Oct 2018 15:33  
Shimadzu Biotech Axima Performance 2.9.1.20100121: Mode Linear\_neg\_2018, Power: 112, Blanked, P.Ext. @ 3500 (bin 85)  
%Int. 65 mV[sum= 9830 mV] Profiles 1-152 Smooth Av 20 -Baseline 60

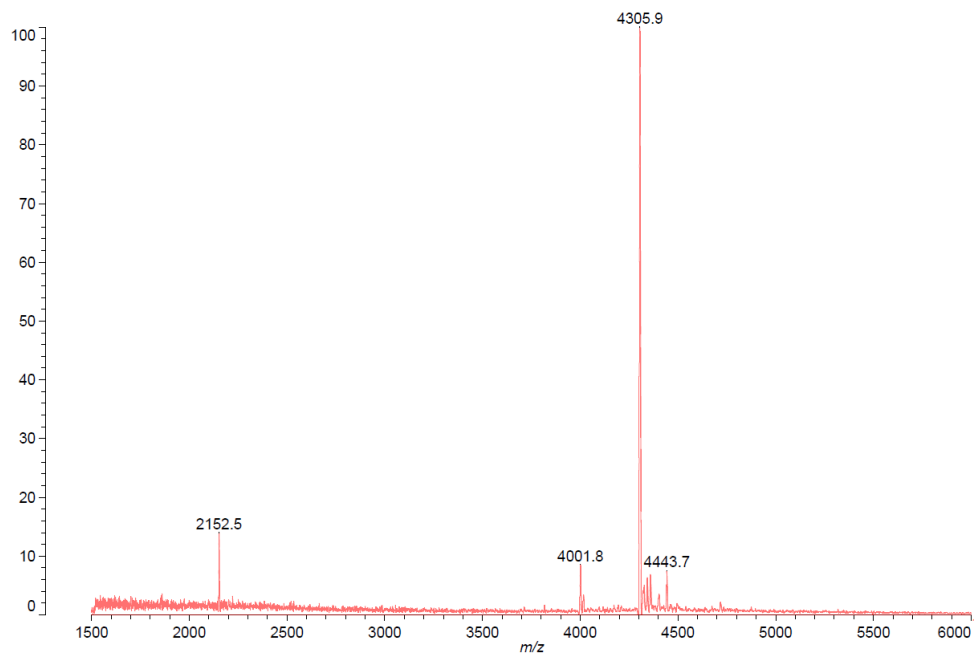

1e: 5'-d(TT**U<sub>B1</sub>** CTT **U<sub>B1</sub>**TC CTC C)-3'

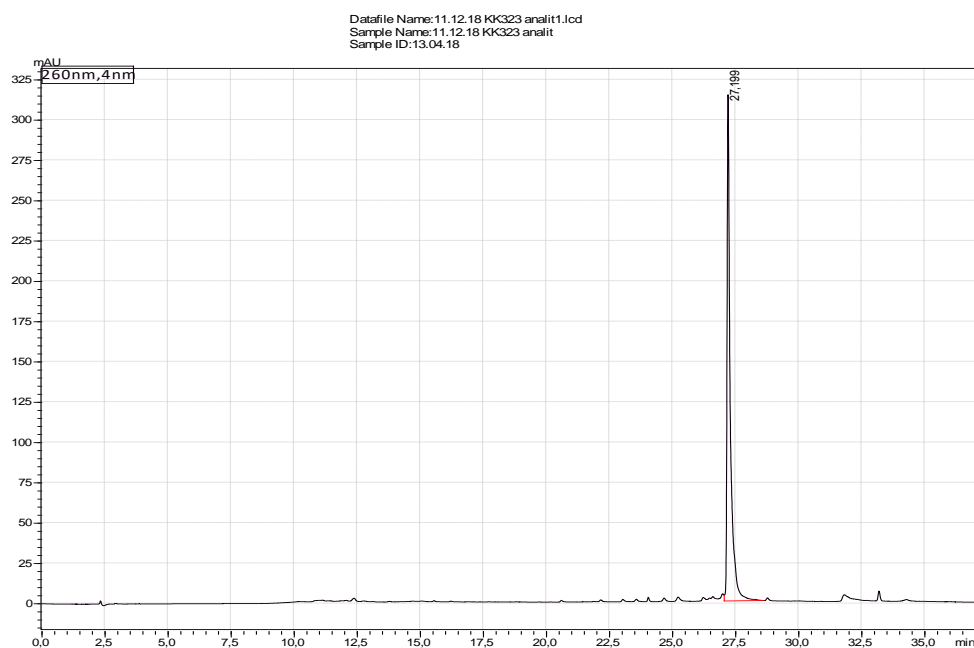

## MALDI-TOF

Kulik K, KK-323, linear neg  
HPA 50 mg/mL H<sub>2</sub>O/ACN 1:1 v/v, AC 50 mg/mL H<sub>2</sub>O/ACN 1:1 v/v; HPA/AC 8:1  
Data: he310002.L17[c] 3 Dec 2018 15:16 Cal: HPA\_T5\_T18 31 Oct 2018 15:33  
Shimadzu Biotech Axima Performance 2.9.1.20100121: Mode Linear\_neg\_2018, Power: 113, Blanked, P.Ext. @ 3500 (bin 85)  
%Int. 21 mV[sum= 3053 mV] Profiles 1-142 Smooth Av 20 -Baseline 60

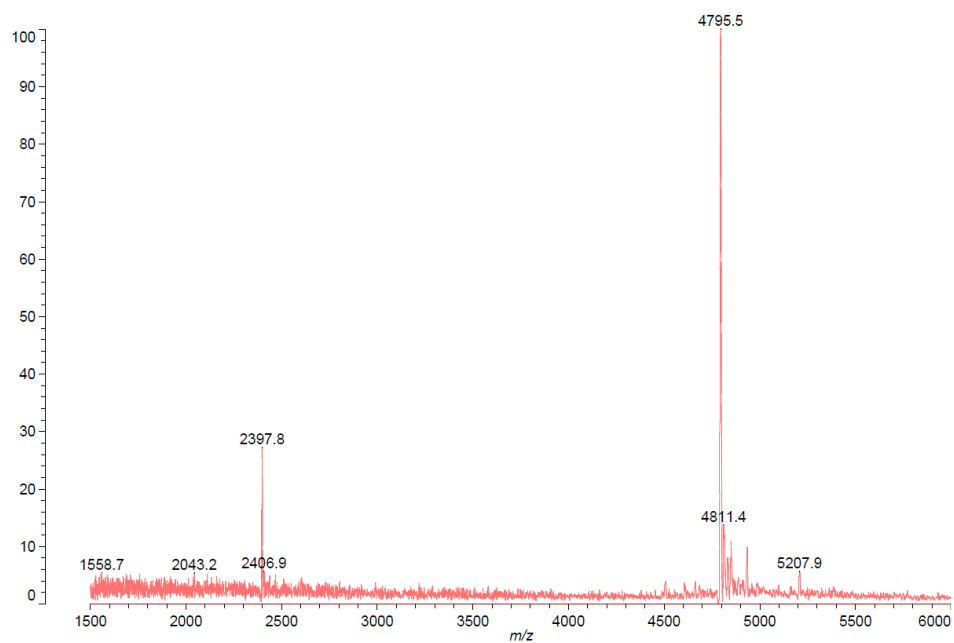

2a: 5'-d(C**U**<sub>B1</sub>C CAG AGC CCGA)-3'

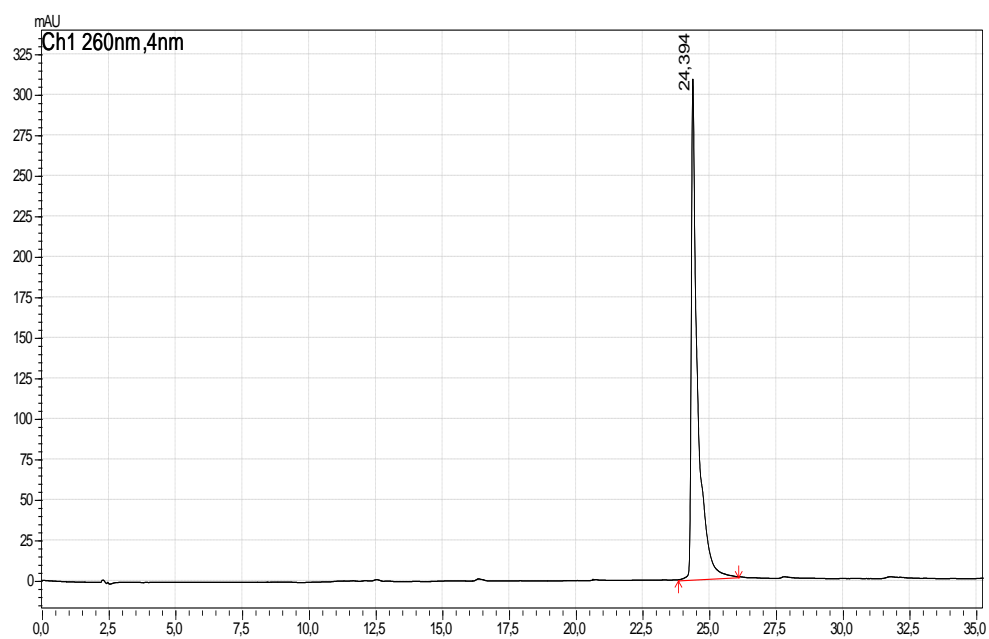

## MALDI-TOF

Ebenryter-Olbinska.K. 608022. linear neg  
HPA 50 mg/mL H<sub>2</sub>O/ACN 1:1 v/v, AC 50 mg/mL H<sub>2</sub>O/ACN 1:1 v/v; HPA/AC 8:1  
Data: hg86003.N13[c] 18 Mar 2019 12:27 Cal: HPA\_T5\_T18 31 Oct 2018 15:33  
Shimadzu Biotech Axima Performance 2.9.1.20100121: Mode Linear\_neg\_2018, Power: 113, Blanked, P.Ext. @ 3800 (bin 88)  
%Int. 21 mV[sum= 1933 mV] Profiles 1-90 Smooth Gauss 15 -Baseline 60

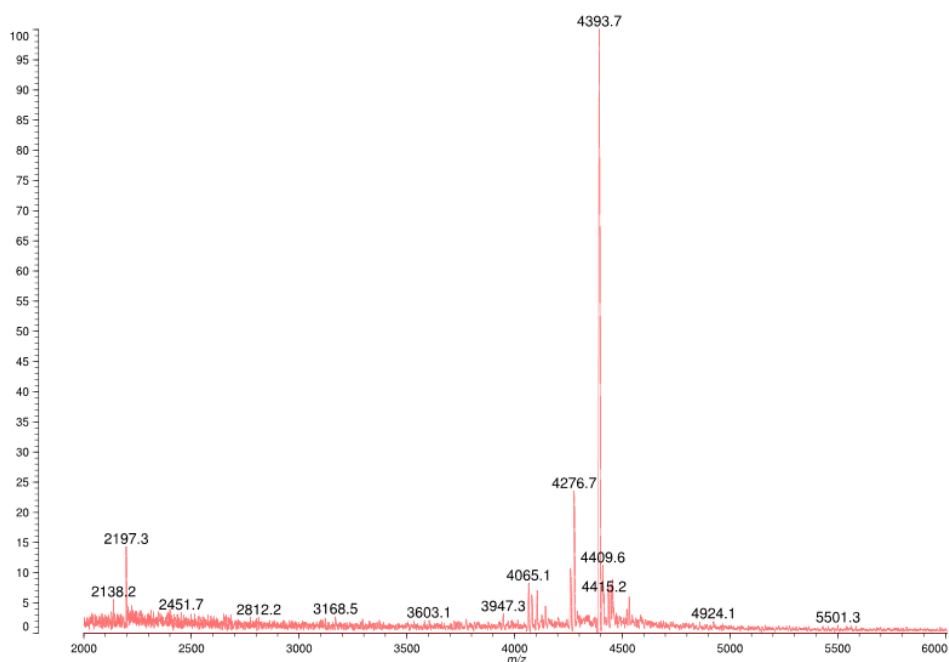

2b1: 5'-d(CTC CAG AGC CU<sub>B1</sub>GA)-3'

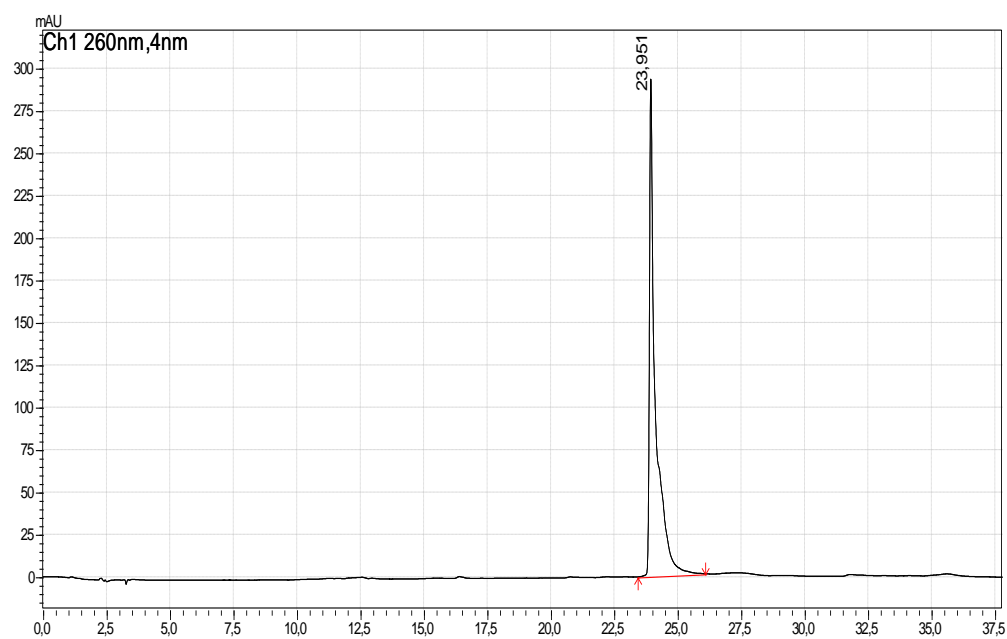

ESI-Q-TOF

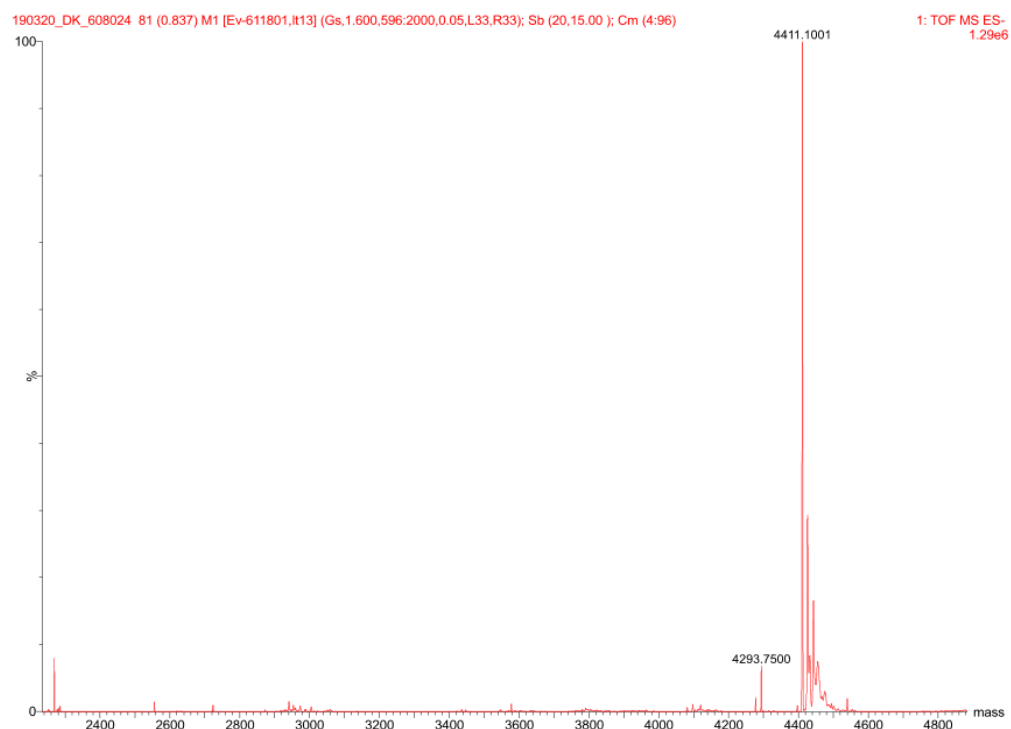

2c: 5'-d(C<sub>U<sub>B1</sub></sub>C CAG AGC C<sub>U<sub>B1</sub></sub>GA)-3'

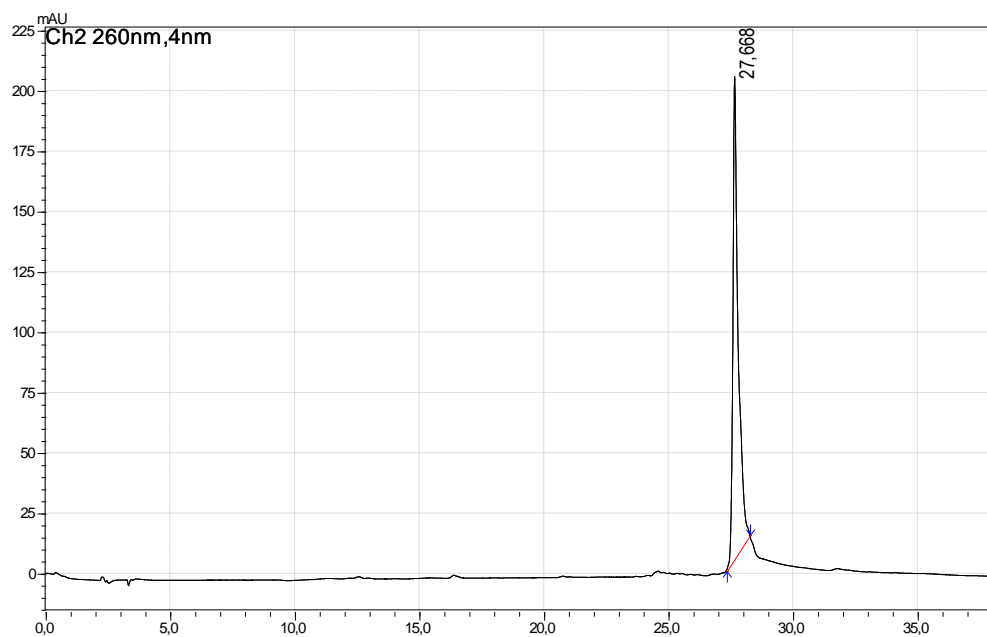

## MALDI-TOF

Ebenryter-Olbinska.K, 608023, linear neg  
HPA 50 mg/mL H<sub>2</sub>O/ACN 1:1 v/v, AC 50 mg/mL H<sub>2</sub>O/ACN 1:1 v/v; HPA/AC 8:1  
Data: hg870003.N16[c] 18 Mar 2019 12:31 Cal: HPA\_T5\_T24 31 Oct 2018 15:41  
Shimadzu Biotech Axima Performance 2.9.1.20100121; Mode Linear\_neg\_2018, Power: 116, Blanked, P.Ext. @ 3800 (bin 88)  
%Int. 5.5 mV[sum= 1045 mV] Profiles 1-191 Smooth Gauss 20 -Baseline 55

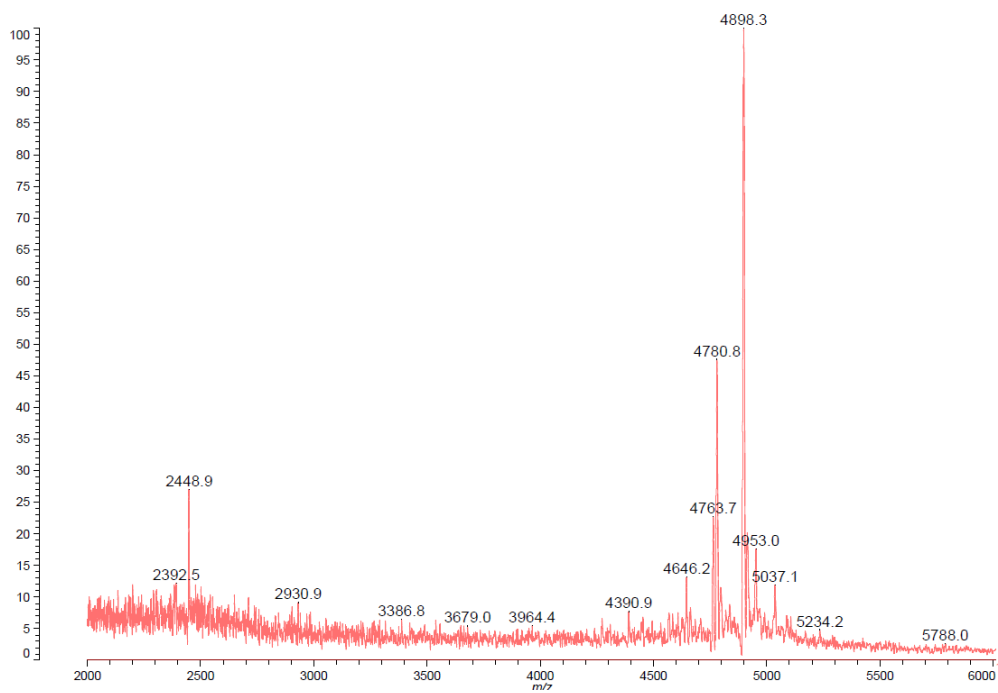

### 3: 5'-(GGG GGA AAA GAA A)-3' (B3 RP-HPLC program)

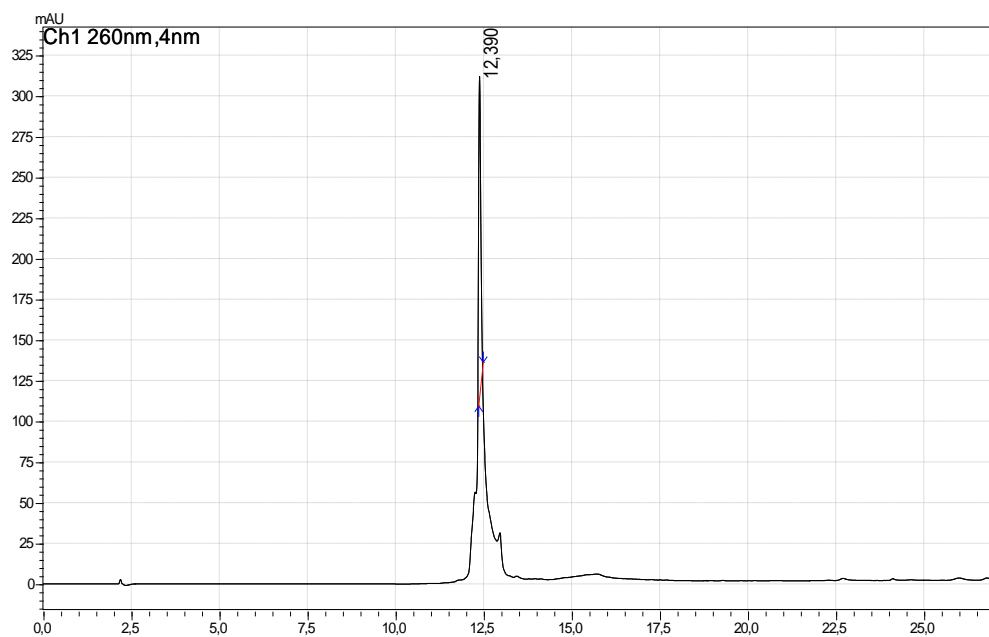

### ESI-Q-TOF

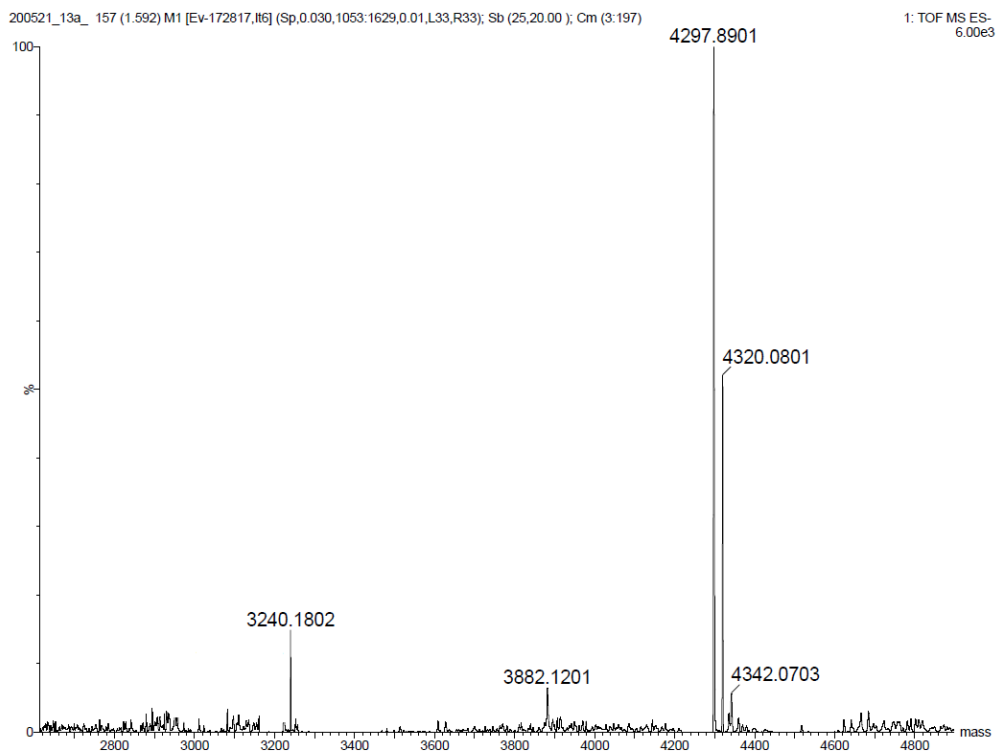

#### 4: 5'-(UCG GGC UCU GGU G)-3' (B3 RP-HPLC program)

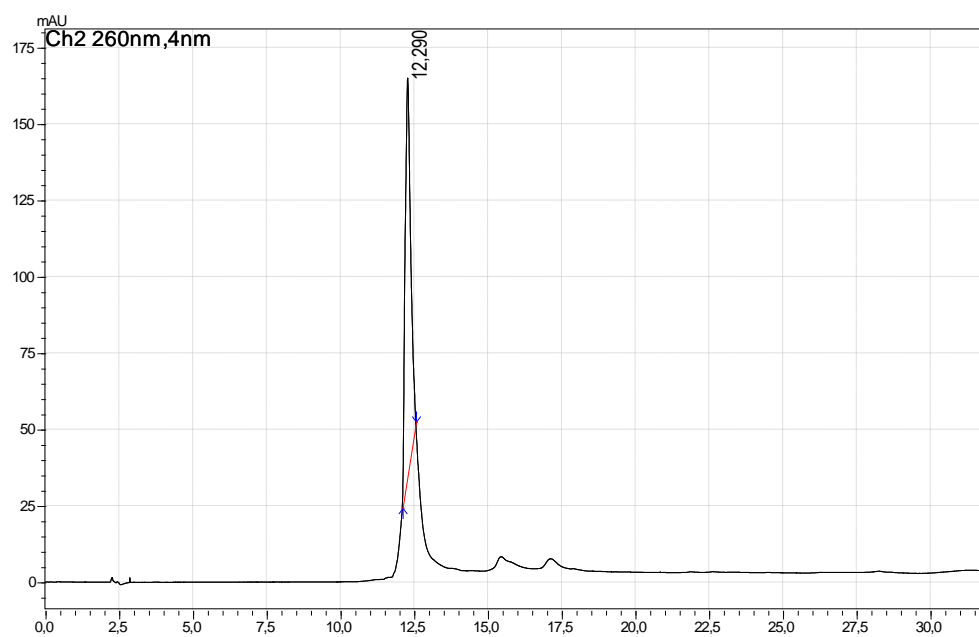

#### ESI-Q-TOF

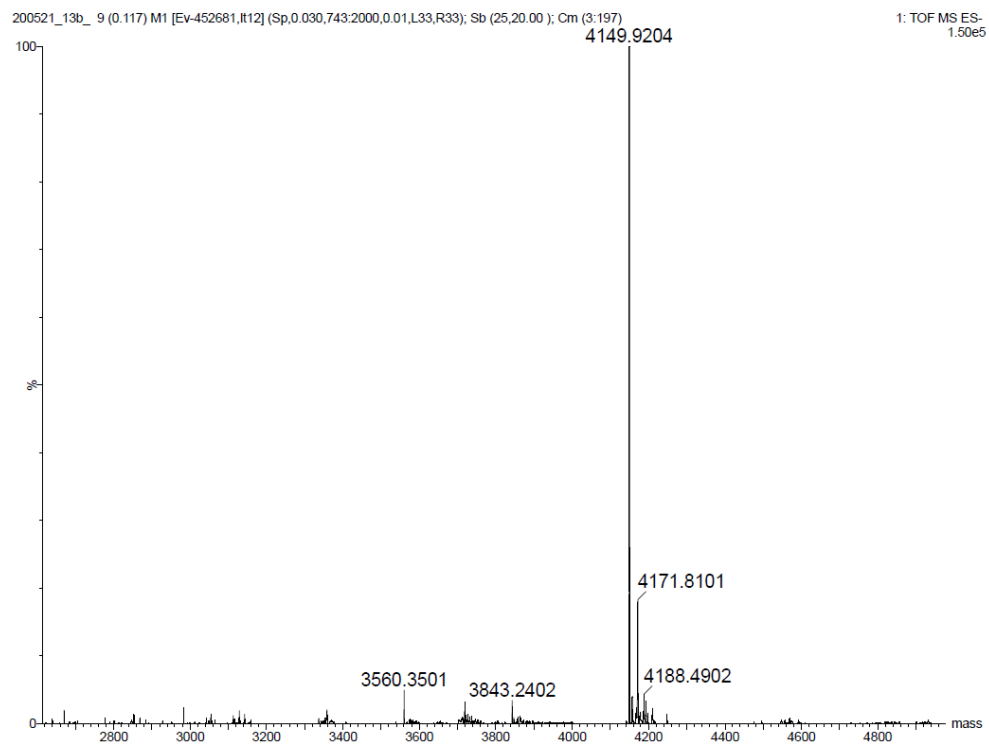

**Figure S2.** Spectral analysis of 8-(5-azido-3-oxa-pentoxy)-3-iron-bis(1,2-dicarbollide)  $[\text{Fe}(\text{C}_2\text{B}_9\text{H}_{11})_2]^-$  (azido derivative of FESAN).

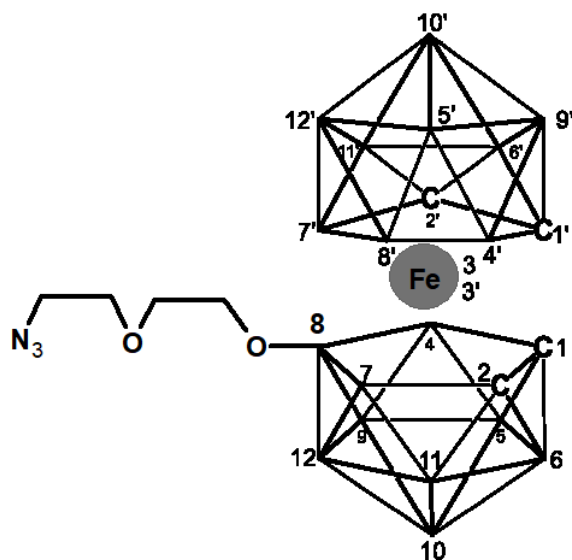

## ESI-Q-TOF MS

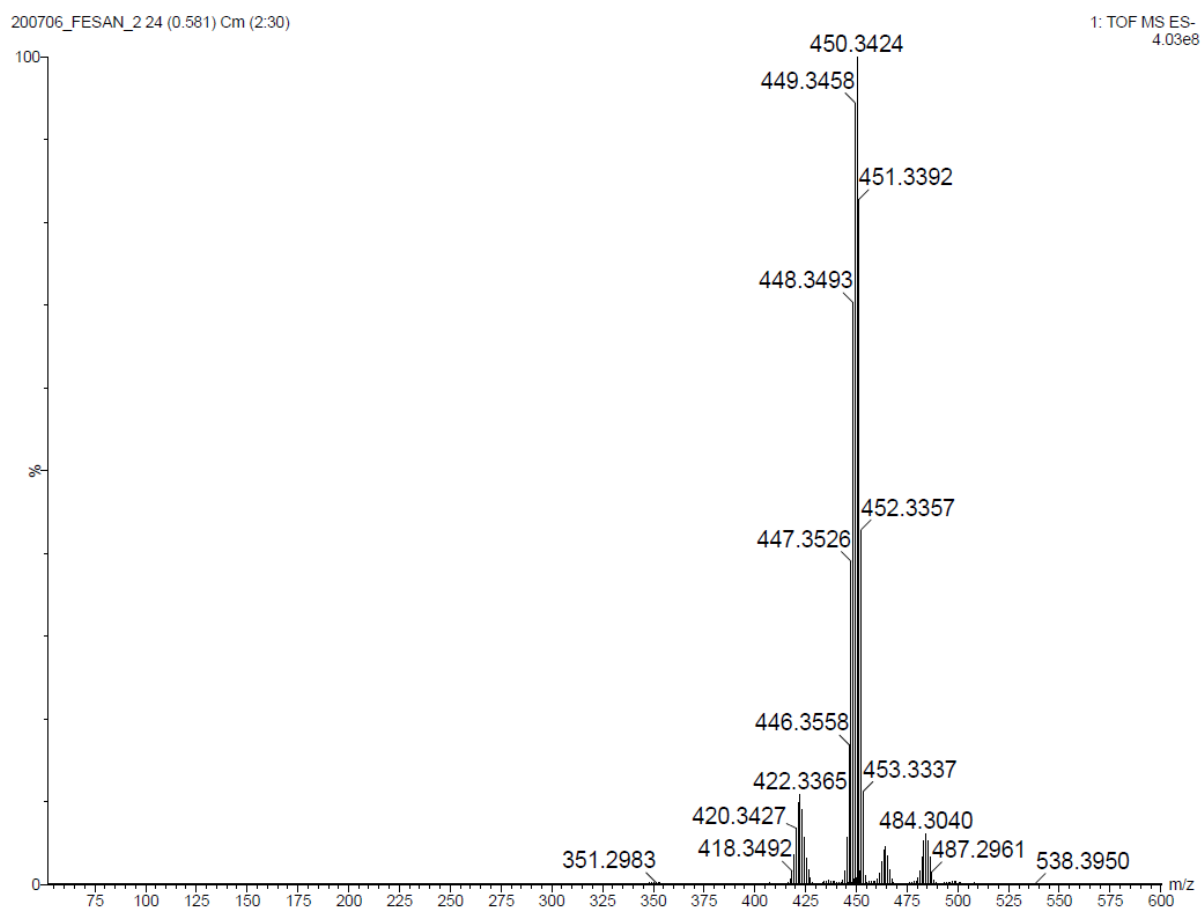



IR

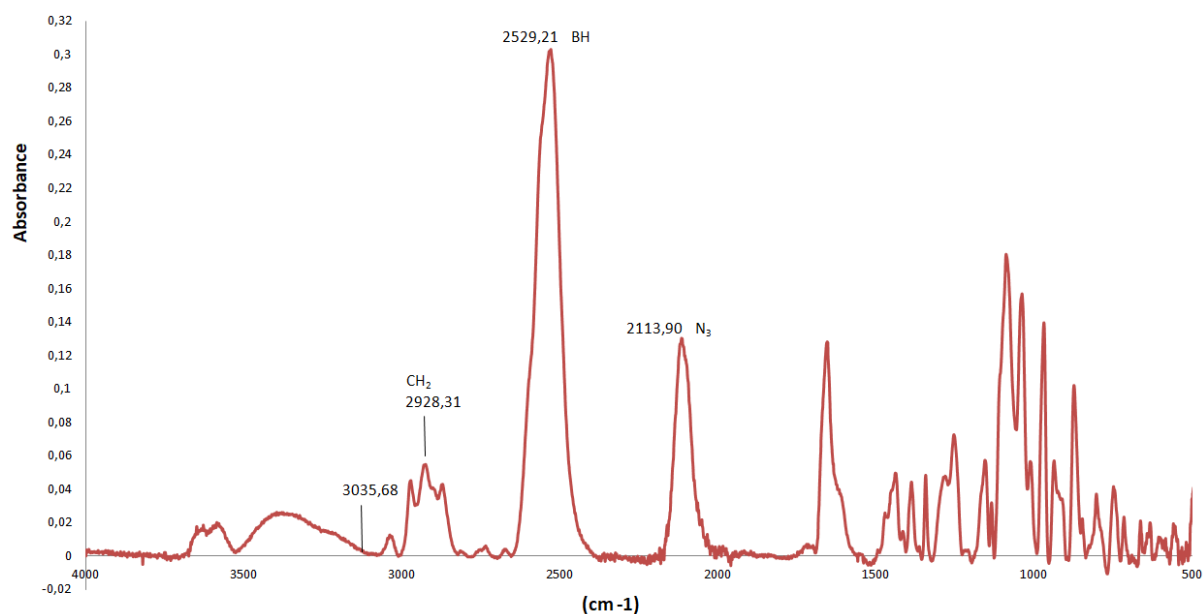

**Figure S3.** Spectral analysis of 1-(3-azidopropyl)-1,2-dicarba-*closo*-dodecaborane (1,2-DCDDDB, [C<sub>2</sub>B<sub>10</sub>H<sub>12</sub>]) (azido derivative of 1,2-dicarba-*closo*-dodecaborate).

<sup>1</sup>H NMR

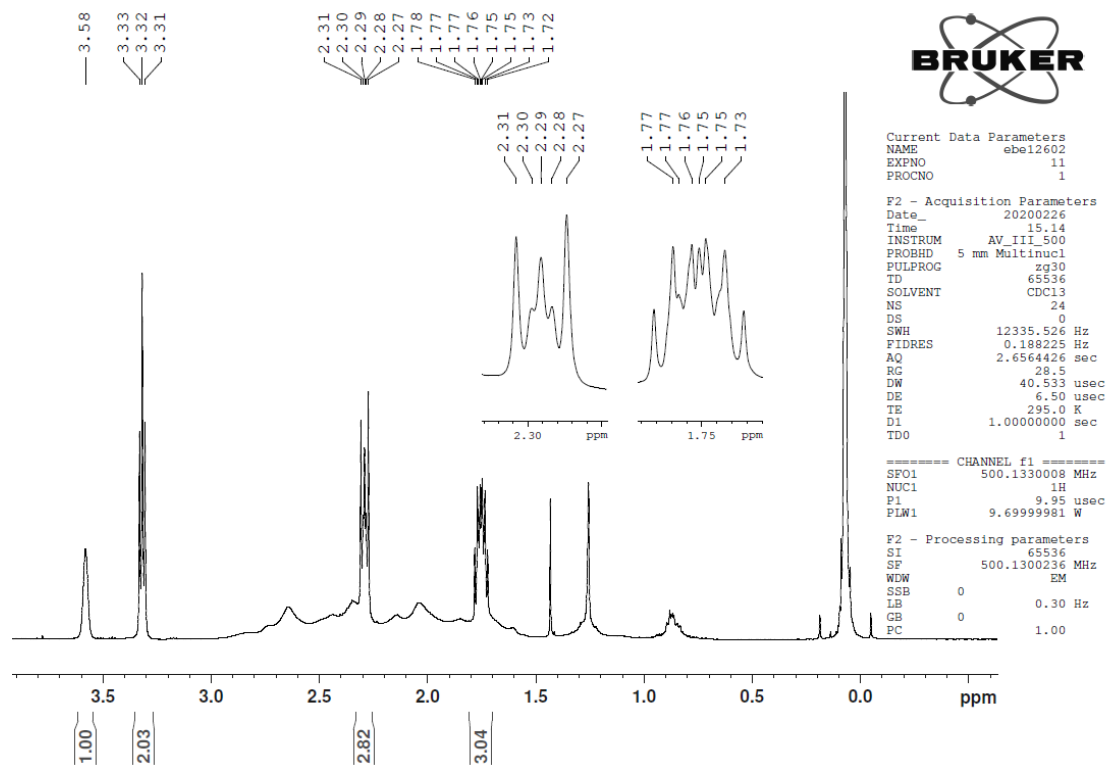

# $^{11}\text{B}$ NMR

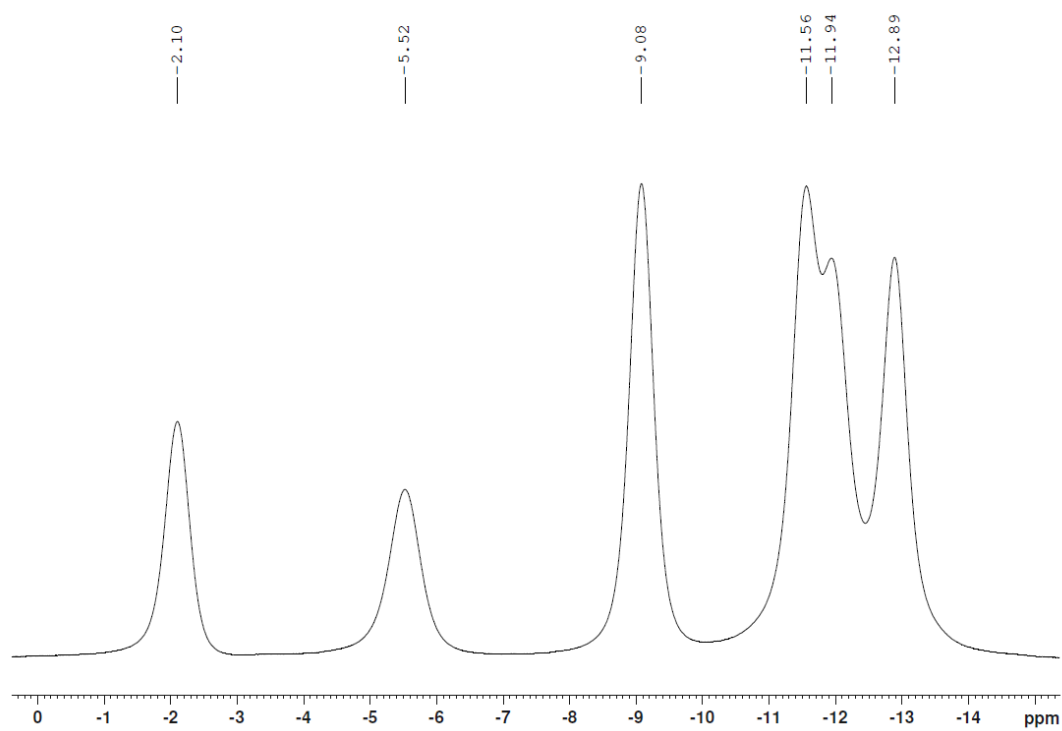

# $^{13}\text{C}$ NMR

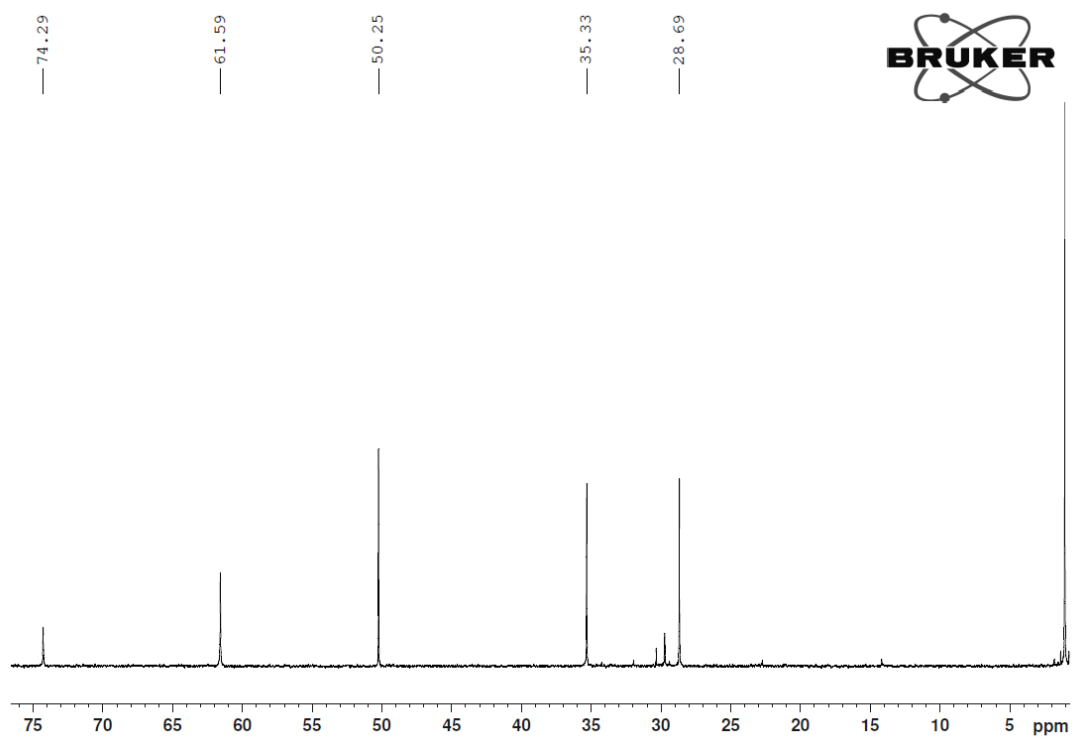

# ESI-Q-TOF

200429\_628010\_neg 2 (0.070) Cm (2:41)

1: TOF MS ES-  
2.70e7

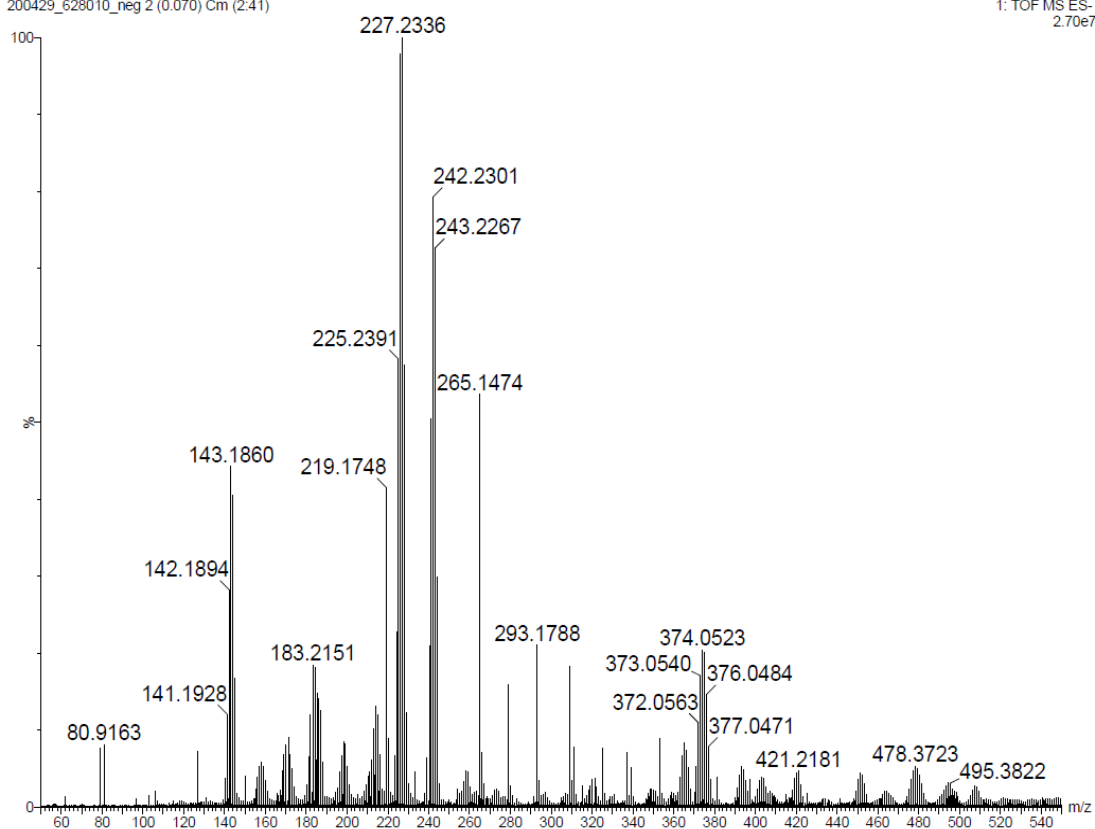

## IR

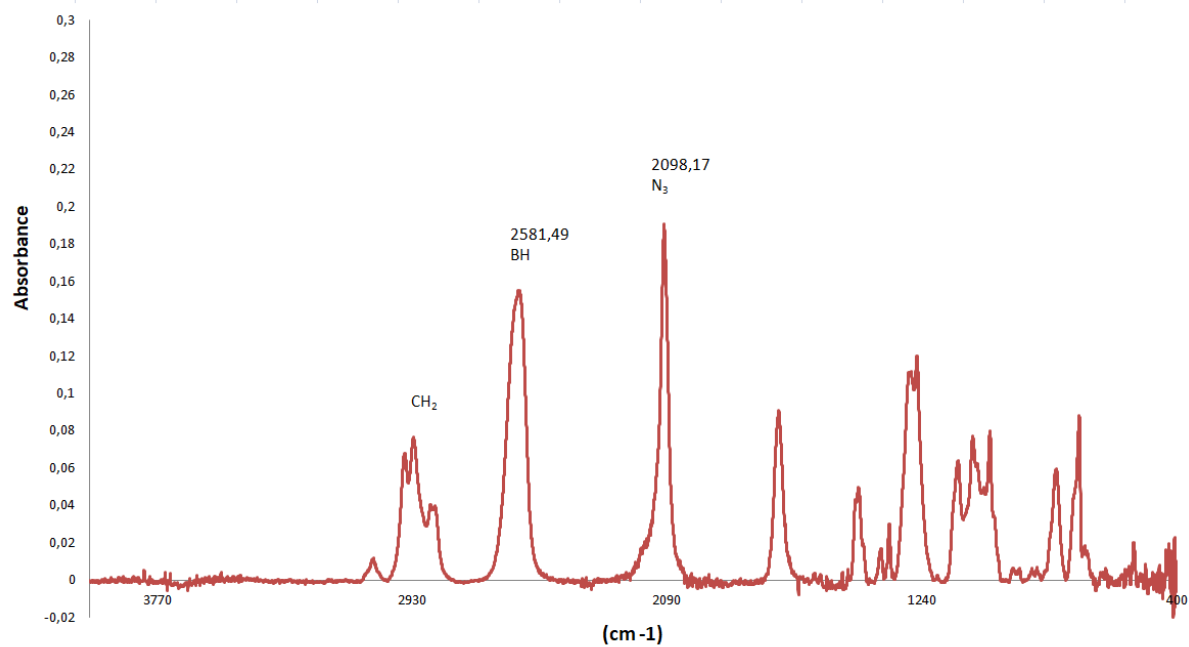

**Figure S4.** Spectral analysis of the bis-tetrabutylammonium-(4-azidobutoxy)-undecahydro-*closo*-dodecaborate (DDB,  $[B_{12}H_{12}]^{2-}$ ) (azido derivative of *closo*-dodecaborate).

## $^1H$ NMR

1H.stan  
1H CDCl3 {D:\NMR\_Data\CBMM\Zespol\_08} Zespol\_08 51

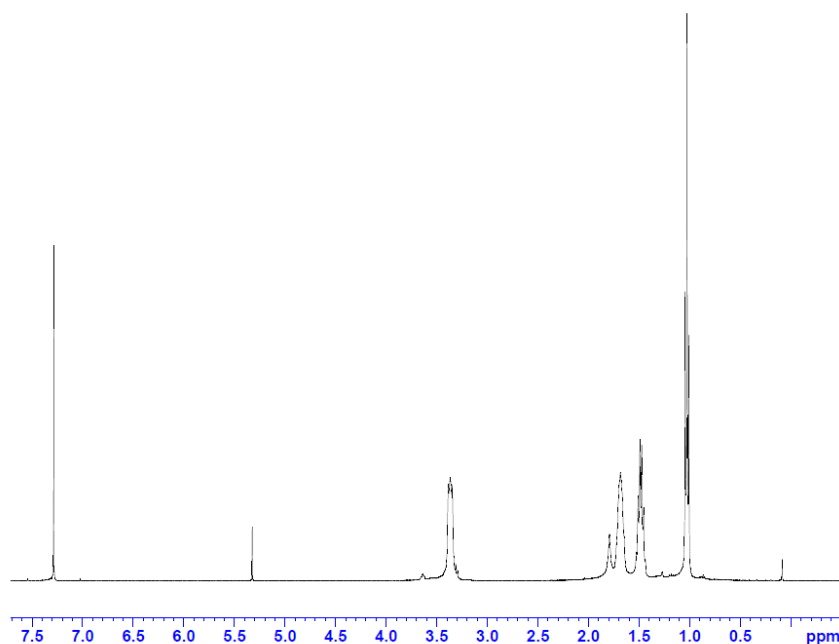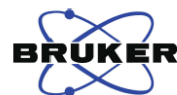

Current Data Parameters  
NAME keo\_dodecaN3 H2O  
EXPNO 1  
PROCNO 1

F2 - Acquisition Parameters  
Date\_ 20211123  
Time 12.16 h  
INSTRUM Avance  
PROBHD Z163739\_0262 (zg30)  
PULPROG zg30  
TD 65536  
SOLVENT CDCl3  
NS 24  
DS 2  
SWH 8196.722 Hz  
FIDRES 0.250144 Hz  
AQ 3.8976959 sec  
RG 101  
DW 61.000 usec  
DE 13.89 usec  
TE 292.8 K  
D1 1.00000000 sec  
TD0 1  
SFO1 400.1524709 MHz  
NUC1 1H  
P0 2.67 usec  
P1 8.00 usec  
PLW1 22.01300049 W

F2 - Processing parameters  
SI 65536  
SF 400.1500000 MHz  
WMW EM  
SSB 0  
LB 0.30 Hz  
GB 0  
PC 1.00

## $^{13}C$ NMR

13C.stan  
13C{1H} CDCl3 {D:\NMR\_Data\CBMM\Zespol\_08} Zespol\_08 52

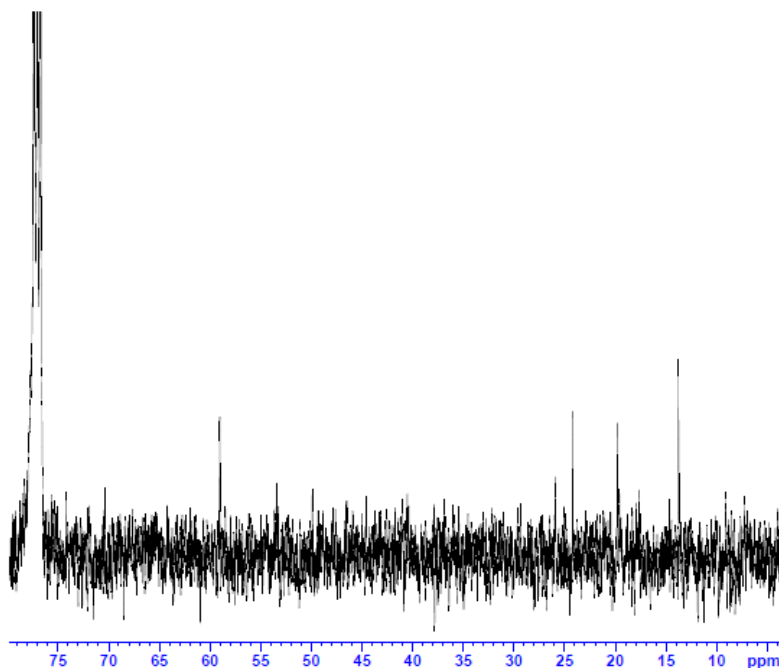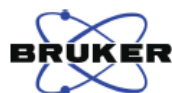

Current Data Parameters  
NAME keo\_dodecaN3 CH2Cl2  
EXPNO 2  
PROCNO 1

F2 - Acquisition Parameters  
Date\_ 20211123  
Time 12.53 h  
INSTRUM Avance  
PROBHD Z163739\_0262 (zgpg30)  
PULPROG zgpg30  
TD 65536  
SOLVENT CDCl3  
NS 256  
DS 2  
SWH 25906.736 Hz  
FIDRES 0.790611 Hz  
AQ 1.2648448 sec  
RG 101  
DW 19.300 usec  
DE 6.50 usec  
TE 293.9 K  
D1 2.00000000 sec  
D11 0.03000000 sec  
TD0 1  
SFO1 100.6298717 MHz  
NUC1 13C  
P0 2.67 usec  
P1 8.00 usec  
PLW1 93.92400360 W  
SFO2 400.1516006 MHz  
NUC2 1H  
CPDPRG2 waltz65  
PCPD2 90.00 usec  
PLW2 22.01300049 W  
PLW12 0.17393000 W  
PLW13 0.08748700 W

F2 - Processing parameters  
SI 32768  
SF 100.6177975 MHz  
WMW EM  
SSB 0  
LB 2.00 Hz  
GB 0  
PC 1.40

## $^{11}\text{B}$ NMR

11B{1H} - kw. borny / D2O = (+)19.5 ppm  
 11B{1H} CDC13 {D:\NMR\_Data\CBMM\Zespol\_08} Zespol\_08 52

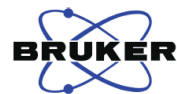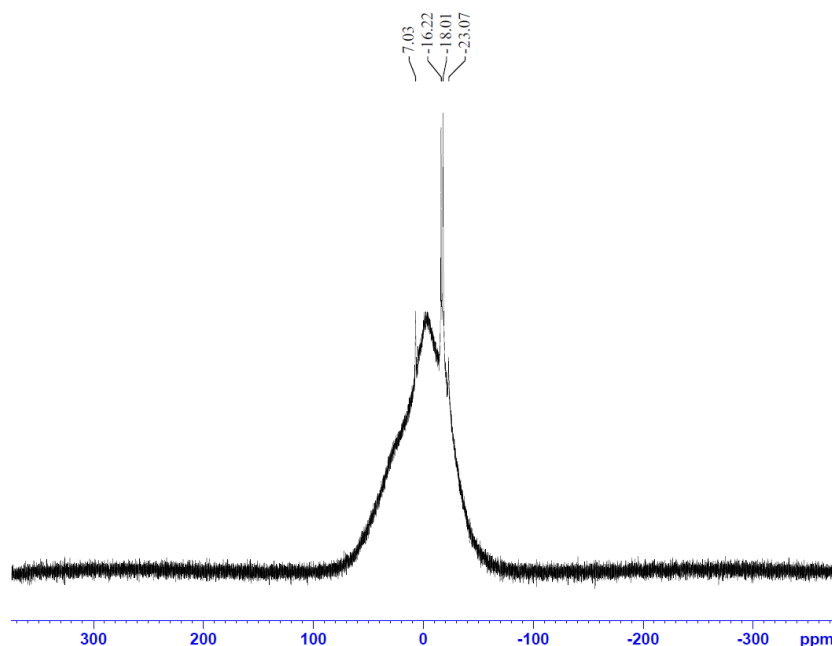

Current Data Parameters  
 NAME ebe\_dodecaN3 11B  
 EXFNO 1  
 PROCNO 1

F2 - Acquisition Parameters  
 Date\_ 20211124  
 Time 13.08 h  
 INSTRUM Avance  
 PROBHD Z163739\_0262 ( zggg  
 FULPROG zgpg  
 TD 65536  
 SOLVENT CDC13  
 NS 64  
 DS 0  
 SWH 96153.844 Hz  
 FIDRES 2.934382 Hz  
 AQ 0.3407872 sec  
 RG 101  
 DW 5.200 usec  
 DE 6.50 usec  
 TE 294.0 K  
 D1 0.25000000 sec  
 D11 0.03000000 sec  
 TD0 1  
 SFO1 128.3840220 MHz  
 NUCL1 11B  
 P1 10.00 usec  
 PLW1 41.05799866 W  
 SFO2 400.1524005 MHz  
 NUCL2 1H  
 CPDPRG2 waltz16  
 PCPD2 90.00 usec  
 PLW2 22.01300049 W  
 PLW12 0.17393000 W  
 PLW13 0.08748700 W

F2 - Processing parameters  
 SI 32768  
 SF 128.3840220 MHz  
 WDW EM  
 SSB 0  
 LB 2.00 Hz  
 GB 0  
 PC 1.40

## IR

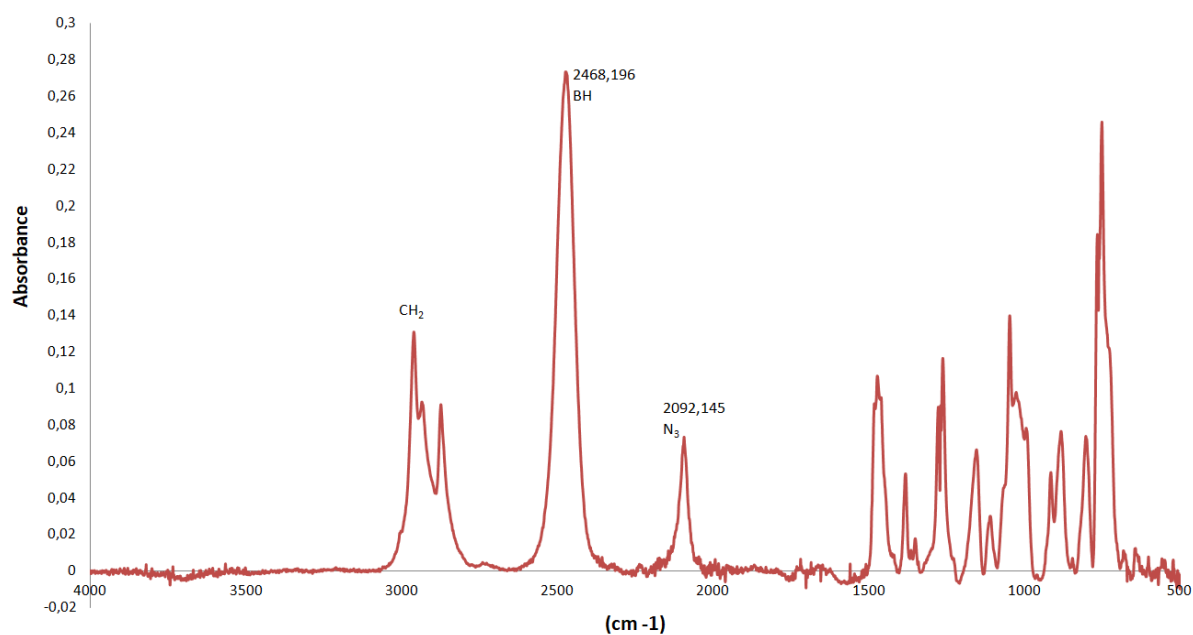

Supplement: s1 [file s1]
